# Supplementary material for: HNF4G increases cisplatin resistance in lung adenocarcinoma via the MAPK6/Akt pathway
Source: PeerJ. 2023 Mar 10;11:e14996. doi: 10.7717/peerj.14996 (PMC10010171; doi:10.7717/peerj.14996)
Supplement: Figure S1 [file peerj-11-14996-s001.xlsx]

## Sheet: Sheet1
Cell line	HNF4G	LN_IC50
LC1SQSF	0.584963	#N/A
RT4	0.356144	2.73749
NCIH1395	1.59455	#N/A
DEL	0.422233	1.75406
SNU1196	0.0840643	#N/A
LC1F	0.411426	#N/A
KE97	1.80736	#N/A
BFTC909	0.321928	2.21303
YKG1	0.0426443	1.8671
MKN1	0.695994	2.74831
LK2	1.31034	3.42447
HS888T	0.0143553	#N/A
ZR7530	1.10434	4.67207
WM983B	0.799087	#N/A
A101D	0.226509	1.54784
NCIH446	2.69599	3.67292
PECAPJ34CLONEC12	0.275007	#N/A
TUHR14TKB	1.57531	#N/A
COV434	0.137504	#N/A
YD10B	0.0703893	#N/A
KMRC3	2.14731	#N/A
KASUMI2	0	#N/A
KYSE140	0.124328	1.42638
MKN7	0.298658	3.00751
MONOMAC6	0.0565835	2.86122
L428	0.731183	2.38894
SKMEL1	0.378512	3.42271
CFPAC1	2.36737	3.19453
OE33	2.15381	3.02978
TE4	2.12763	3.03449
HEC6	0.0143553	#N/A
EFM192A	0.321928	4.20342
FU97	1.36177	3.41806
LOUNH91	1.54597	3.35379
SKBR3	0.201634	#N/A
NCIH1975	0.238787	3.51546
NCIH2126	1.0635	#N/A
EPLC272H	0	2.75641
IGR39	0	#N/A
LCLC103H	0.536053	3.06755
OAW42	2.31034	2.26772
HCC38	2.26303	4.26738
U87MG	0.575312	3.19447
HEP3B217	2.6893	2.58771
HEC1B	2.88753	#N/A
CALU3	2.68032	5.03539
AM38	0.378512	2.57525
CAL51	1.68706	2.19907
SF295	1.11103	2.35518
L33	0.575312	#N/A
AGS	1.43829	2.80964
NCIH1650	0	1.79134
HS934T	1.26903	#N/A
HT144	0.344828	2.49672
HT29	3.92884	4.55614
ASPC1	4.94298	3.73497
SKNAS	1.52607	2.77851
COV644	0.31034	#N/A
LS123	1.12433	4.6222
NCIH441	2.84599	5.08147
NCIH1869	1.61353	3.94718
SNU668	0.0143553	#N/A
HCC1937	0.0143553	3.49372
TE441T	0.0426443	#N/A
HEC265	0.613532	#N/A
LCLC97TM1	2.50843	2.67891
HS944T	0.895303	#N/A
EN	0.189034	3.61935
YAPC	2.1375	5.58047
SNU1105	0.275007	#N/A
HCC1171	2.35896	#N/A
HS940T	0	1.53402
U937	0.0143553	#N/A
CW2	4.37086	3.25218
SH4	0.831877	4.15189
REH	0.0143553	1.78237
GAMG	0.790772	3.84105
HCT116	1.52105	2.75267
HT55	3.38128	4.19805
KMS27	2.9982	#N/A
MCF7	0.321928	3.09066
NCIH2170	2.87184	2.85221
SR786	0.124328	#N/A
NCIH510	0.925999	#N/A
HGC27	2.22342	1.89209
CAL27	1.48543	1.85475
UO31	2.47768	#N/A
HT	0	3.78272
KNS62	0.823749	2.5863
OE21	0.137504	3.43738
HCC202	0.0426443	3.44337
SW1710	1.1177	3.46626
LXF289	1.79494	2.80316
DMS273	0.0143553	2.26656
NCIH69	2.53107	4.58217
SNU1079	2.37574	#N/A
HUPT4	0.83996	2.14631
SNU81	4.62469	4.10947
C32	1.26303	2.1993
KMRC1	1.30451	3.88914
HCC1195	0.0976108	#N/A
PECAPJ41CLONED2	0	#N/A
IMR32	0.731183	#N/A
HDQP1	0.443607	3.67557
CAKI2	2.92979	#N/A
647V	0.722466	2.13114
NH6	0.963474	#N/A
SIGM5	0	#N/A
NCIH2444	1.03562	5.16137
SW1573	1.36177	3.75932
D283MED	1.40054	1.25559
GSU	4.1334	#N/A
IALM	0.400538	2.92267
NUDUL1	0	0.986548
KYSE70	0	3.39194
DMS114	0.137504	2.76944
KMS12BM	0.0565835	2.85878
C2BBE1	1.7137	2.6311
NCIH716	3.48929	3.36677
HL60	0.0143553	2.03177
JHUEM7	0.163499	#N/A
EB1	0.0143553	#N/A
JIMT1	0.0143553	2.68065
L1236	1.1375	2.68013
BT16	0	#N/A
CAPAN1	2.33628	2.58609
HCC827	3.36877	2.2018
RH18	0.0565835	4.1848
TUHR10TKB	2.35614	#N/A
SNU878	2.31615	#N/A
NCIH508	3.3978	5.88523
CL11	2.28096	3.95096
KALS1	0.0285692	3.61888
NCIH650	0.807355	3.06837
AU565	0.0143553	2.98456
RKO	2.47508	3.06925
OCIM1	1.03562	2.36675
BECKER	0.85599	2.72617
NCIH1755	1.9782	4.12021
RERFLCAI	0.933573	#N/A
PANC1	0.613532	#N/A
OCILY3	0.0143553	#N/A
KIJK	0.0143553	#N/A
SNUC1	3.10769	6.77496
CAL851	0.201634	4.08405
MONOMAC1	0.594549	#N/A
CCFSTTG1	0.111031	#N/A
TALL1	0.0285692	#N/A
VMCUB1	2.12763	#N/A
OCILY19	0.0143553	1.22822
ECC10	0.0703893	3.73547
FTC238	0.613532	#N/A
PECAPJ15	0.722466	3.40863
HSC4	0.321928	0.573598
NCIH2052	0.15056	2.82095
OAW28	0.176323	2.25376
KMH2	0	3.62909
JHOC5	2.87774	#N/A
SNU719	3.54967	#N/A
SNU410	2.0036	#N/A
A549	1	2.27904
697	0	#N/A
VMRCRCW	6.06393	3.26549
KP3	4.18824	2.51469
HUH28	0.0143553	#N/A
SUDHL8	0.0143553	1.55393
HCT15	2.85	2.82756
LN18	0.367371	2.09672
SUPM2	2.34483	1.18409
SKES1	3.45418	2.40329
MKN74	0.411426	#N/A
DU4475	1.76554	2.72863
SW579	0.0426443	#N/A
NCO2	0.0840643	#N/A
HUT78	1.23879	#N/A
T98G	0.0143553	3.36436
MHHES1	2.10769	2.01382
KLE	0.722466	4.70793
SNU61	3.16027	4.23618
NAMALWA	0	1.24161
NCIH2081	1.93357	2.38979
HEC1A	3.16511	#N/A
LP1	0.713696	4.04853
BT12	0	#N/A
SNU175	4.62644	#N/A
SNU245	4.51223	#N/A
KMS11	1.91839	2.49958
PF382	0	2.98767
MM1S	0.641546	2.49967
JURLMK1	0.464668	1.4245
NCIH524	1.08406	1.99003
CMK	0.0285692	1.98653
CALU1	0.978196	#N/A
MC116	0	2.97133
YD15	1.23879	#N/A
HCC56	2.89724	#N/A
HCC1833	4.97957	#N/A
HUH6	2.10098	#N/A
NCIH1184	0.214125	#N/A
COLO684	3.07039	3.39661
TE14	2.88557	#N/A
CHP126	0.0285692	2.0302
CA46	0.0143553	4.26233
SW1271	0.201634	3.65532
GOS3	1.28096	#N/A
HCC78	2.26303	3.12767
SJSA1	0.176323	2.91503
UMUC1	0.0285692	#N/A
RCM1	3.12763	3.99298
MESSA	0	2.01511
NCIH2196	0.15056	#N/A
P31FUJ	0	3.54164
KE39	4.20633	#N/A
HCC4006	0.0565835	#N/A
PATU8988S	4.3427	#N/A
DB	0	1.65937
HCC1143	1.18903	3.5159
PEER	0.0976108	#N/A
FUOV1	0.948601	3.73687
HS578T	0.111031	2.50275
HCC2108	0.238787	#N/A
U118MG	0.713696	2.79879
TYKNU	1.48026	2.10048
SNU626	0	#N/A
SW1088	0.0840643	2.13379
KO52	0	#N/A
BICR16	0.0840643	#N/A
NCIH747	1.66903	5.3627
SKCO1	3.77926	0.963391
TE10	0.321928	4.04243
JHUEM1	0.15056	#N/A
NCIH1651	4.24717	2.02888
KMM1	0.879706	#N/A
SNU601	2.61589	#N/A
MDAMB415	1.5656	3.95345
PANC0403	2.75916	5.0501
T84	2.98185	4.58652
SNU489	0.62293	#N/A
ISTMES1	0.400538	2.08633
NCIH2172	0.0143553	4.2324
OUMS23	0.0143553	#N/A
CAOV3	0.815575	#N/A
SF539	1.53107	1.372
NCIH211	0.963474	2.82379
SQ1	2.90689	#N/A
HPAFII	3.80735	3.35086
SKHEP1	0.495695	3.70471
RMGI	1.69599	5.34276
PL21	0.0143553	5.26346
NCIH810	5.17712	3.65263
HS839T	0.378512	#N/A
SNU685	0.0840643	#N/A
MHHCALL3	0.0143553	#N/A
KYSE450	0.344828	3.09889
ME1	0	4.11277
OPM2	3.50716	3.70151
NUGC4	4.01525	3.65993
SBC5	0.214125	3.17595
PATU8902	1.43829	3.29597
KASUMI1	0	3.36479
SNU5	5.22342	3.09743
KATOIII	3.0036	3.58392
SNU1033	2.43029	#N/A
KMRC20	2.95606	2.54241
PANC0327	0.739848	2.71884
K562	0	3.56976
NCIH1623	0.111031	3.82419
SNU449	0.963474	3.76468
OCIAML3	0.895303	2.26722
KU1919	0.286881	2.14067
OE19	3.67356	3.46
OCUM1	3.99548	3.35211
OVK18	1.30451	1.97668
SNU738	0.0976108	#N/A
JHH4	2.06695	2.42436
NCIH2171	0	#N/A
NCIH661	0.124328	2.05472
KNS81	1.5656	#N/A
SNU407	3.74308	2.67266
NCIH1734	2.54844	2.03031
KARPAS620	0.321928	4.3422
SW1990	0.163499	1.90621
HPAC	0.378512	2.9203
SNU503	1.25701	#N/A
SF268	0.111031	1.00371
SKLMS1	0.0426443	1.80557
SCC25	0.356144	3.60949
BDCM	0.659925	#N/A
THP1	3.33914	3.00409
BICR6	0.918386	#N/A
HCC1438	1.7137	#N/A
CL34	4.41751	#N/A
MORCPR	0.214125	#N/A
KYSE510	1.17632	1.292
NCIH146	0.400538	3.43296
HH	3.28392	2.89576
UACC812	0.124328	#N/A
P3HR1	0	#N/A
BEN	3.15056	2.26651
KCL22	0.910733	3.09737
KMS34	1.97453	#N/A
SW948	4.31759	4.74945
MOLM16	0.0143553	1.94688
SNU1041	0.15056	#N/A
SW1463	4.52168	5.38981
HUPT3	2.54597	3.10181
RVH421	0.124328	3.81188
BV173	0.0143553	1.43892
HS294T	0.163499	#N/A
KYSE520	0.731183	3.24102
NCIH1341	0.163499	1.73102
NCIH1915	1.26903	2.83285
HELA	0.214125	1.92653
TTC709	2.11103	#N/A
GI1	1.50589	0.659261
J82	0.400538	1.63907
RL	0	3.45541
KP4	0.298658	2.09682
JHOS2	0.823749	3.23823
HOS	0	1.24086
KYSE150	0.0143553	4.29939
ES2	0.632268	2.25922
RPMI7951	0.0565835	1.50819
SCC4	0.879706	2.92876
JHOM1	1.79494	#N/A
HLF	1.23266	#N/A
SNU201	0.632268	#N/A
MG63	0.475085	2.40318
MDAMB157	1.31034	3.73297
DOHH2	0.0285692	1.3251
SNU182	1.36177	#N/A
NCIH1092	0.189034	3.71467
TE617T	0.15056	#N/A
HS895T	0	#N/A
EFO27	0	2.92538
TT2609C02	0.863939	2.96296
MFE319	0.0976108	4.71583
OCIAML5	0.0285692	1.83853
SF126	0.0426443	2.31127
SNB75	0.176323	3.74708
22RV1	3.62293	3.13309
SUIT2	3.7761	1.83621
NCIH1944	3.8166	2.57599
HSC2	0.389567	3.06379
LS513	3.58135	3.7952
KPNSI9S	1.63691	#N/A
HCC2218	0.62293	5.36001
KPL1	0.632268	#N/A
SKMES1	1.37295	3.60227
MHHNB11	0.0143553	1.79258
HS822T	0.0426443	#N/A
CAL33	1.52607	2.26945
LS1034	3.27947	4.333
G361	0.0976108	2.725
HCC1419	0.0143553	2.08113
WM2664	0.0703893	#N/A
DAUDI	0	3.70972
COLO668	3.47508	3.64185
SNU761	2.11103	#N/A
KMS28BM	2.36737	#N/A
HT1376	0.0143553	3.33755
UMUC3	0.847997	1.59845
EKVX	0.0976108	6.10993
NCIH1385	1.23879	#N/A
BHY	0.485427	2.44035
UACC62	0.831877	2.43193
G402	0.0285692	1.59617
JMSU1	0.505891	#N/A
PECAPJ49	0.807355	#N/A
RAJI	0.0285692	3.25938
K029AX	0.0143553	#N/A
IGR1	0.0565835	3.17451
CADOES1	2.42761	1.97111
KYO1	0.669027	#N/A
PC3	1.26903	2.56454
SET2	0.0565835	#N/A
TE6	1.55582	3.69903
CJM	0.422233	#N/A
HEL	0	0.503415
JK1	0	#N/A
OV7	0.15056	3.18444
MEC1	0.0285692	#N/A
EJM	0.176323	4.11564
NCIH2342	0.807355	3.42792
HT1197	0.0143553	3.67885
CAL12T	0.0143553	4.85938
GA10	0.0703893	3.09178
T24	0.0703893	1.24918
HMC18	1.09085	#N/A
NCIH2452	0.0143553	4.43931
NCIH28	2.94298	3.33746
LOVO	4.15137	3.24634
NCIH929	0.565597	2.63504
NCIH226	0.0426443	3.42236
KHM1B	1.76128	#N/A
HEC50B	2.96162	#N/A
TC71	1.66903	1.48018
OVSAHO	0.226509	#N/A
HS746T	3.34483	2.72208
U251MG	0.0703893	#N/A
L540	1.58014	1.78809
JL1	0.0285692	#N/A
SIMA	1.47508	2.45822
CAL148	0.0143553	#N/A
786O	2.926	#N/A
ACCMESO1	0.378512	#N/A
SKNSH	0.757023	1.9311
CAL29	0.250962	2.0834
KPNYN	0.748461	5.02798
A3KAW	0.613532	1.6077
HPBALL	0	#N/A
CALU6	0.432959	3.81128
KYSE410	1.18269	3.70785
RH41	0.0143553	2.59504
PANC1005	2.52857	2.21598
LS180	3.43829	5.07382
IGR37	0.0285692	2.38877
HUG1N	4.03914	#N/A
YD38	0.201634	#N/A
RCHACV	0.0426443	1.04383
HCC1954	0.400538	4.08907
HEC108	3.06695	#N/A
SAOS2	1.59455	3.55829
BT474	0.201634	5.34781
TE9	1.22651	2.90661
MDST8	0.0285692	2.50605
MOLT16	0.0285692	1.55629
SNGM	0.687061	3.54994
NCIH889	0.545968	#N/A
DANG	0.765535	3.55011
MOLM13	0.111031	1.70299
HARA	0.757023	2.78617
HCC366	0.475085	1.56126
TM31	0.687061	#N/A
MV411	0.275007	1.06922
UBLC1	2.72465	#N/A
NCIH2286	0.0565835	#N/A
CORL88	0.0143553	4.92303
JHH2	1.30451	3.34324
MDAMB231	0.226509	2.94781
RPMI8402	1.73985	1.97974
HCC44	0.807355	0.938421
5637	0.895303	#N/A
TF1	0	#N/A
253JBV	2.38681	#N/A
AMO1	0.0976108	3.3556
SKMEL24	0.356144	2.68311
HCC1500	1.7137	4.96215
OVISE	2.61117	2.60467
CAL78	0.163499	2.71549
KURAMOCHI	0.238787	2.69173
SUDHL6	0.0285692	2.66171
769P	2.96532	2.19609
NCIH2291	2.17632	5.56309
FTC133	0.0840643	1.70843
CAKI1	1.72683	2.2174
COV362	0.545968	#N/A
COLO320	0.137504	#N/A
OVCAR8	1.54102	2.45093
RDES	1.38405	#N/A
NCIH1703	0.321928	3.75124
8505C	0.189034	2.57683
SKNFI	0.286881	4.20985
PANC0813	1.72683	2.55748
CHP212	1.96717	1.99852
LU65	1.93734	4.91535
JJN3	1.09085	3.87773
SCABER	0.536053	#N/A
HS611T	0.0285692	#N/A
42MGBA	0.0426443	3.01342
NCIH1693	0.367371	4.15479
NCIH1155	1.33914	2.1255
JVM2	3.34056	3.06063
JHH5	2.23266	#N/A
NCIH1373	1.5509	#N/A
SKMEL5	0.0426443	2.26134
DMS53	3.65878	5.10463
BFTC905	0.0565835	1.05001
CCK81	4.24336	4.94788
NCIH1435	3.84499	5.29221
WM1799	0.678072	#N/A
SKMEL2	0.163499	2.76384
U2OS	0.0703893	1.77622
NCIH1666	0.475085	3.17557
SNU1	0.344828	2.27413
CAMA1	0.250962	1.64102
LAMA84	0.0285692	1.90702
HUCCT1	0.516015	3.46184
CHAGOK1	0.0143553	2.66002
WM115	0.411426	2.76777
HMCB	0.85599	#N/A
SNU1077	1.41143	#N/A
ECGI10	1.09085	2.67547
NCIH522	0.0143553	2.9302
VMRCRCZ	3.0054	4.80696
JHUEM3	3.78031	#N/A
BXPC3	1.73118	2.03785
RERFLCAD2	0.0426443	#N/A
HS766T	0.0143553	2.95878
8305C	0.238787	3.9348
HEC59	0.0976108	#N/A
P12ICHIKAWA	0.0285692	1.57447
NB1	0.124328	2.44158
253J	2.38128	#N/A
NCIH1838	3.01436	5.60651
HUNS1	1.3505	#N/A
SNU308	2.12433	#N/A
SKMEL30	0.0143553	1.44942
COLO680N	0.163499	3.48603
GB1	0.0840643	0.705913
NCIH1105	0.124328	1.43826
KM12	3.79701	3.87939
SYO1	1.75702	#N/A
G292CLONEA141B1	0.0565835	2.68722
TE11	0.526069	2.68651
SHP77	0.214125	4.54266
TE1	0.0285692	3.23073
M07E	0.0143553	#N/A
MHHCALL4	0.0143553	#N/A
KARPAS422	0	3.20716
A204	0.0426443	3.19367
EFE184	1.02857	#N/A
RL952	1.45418	2.73115
SW1783	0.0840643	2.86719
MELHO	0.137504	2.02872
GCT	0.411426	1.68349
SNU1214	0.189034	#N/A
RS411	0	1.58484
MDAMB453	0.0143553	4.6202
PFEIFFER	0.0840643	#N/A
KYSE180	0.263034	1.71992
SKOV3	2.65306	4.02101
KE37	0	1.69771
SKMEL3	0.0976108	4.81249
NCIH209	0.214125	-0.410928
NCCSTCK140	0.678072	#N/A
GMS10	2.12763	#N/A
RPMI8226	0.0426443	2.74539
MOLT3	0.0285692	#N/A
NCIH647	1.40599	2.55698
ESS1	0.15056	1.04031
NCIH526	4.70432	1.18159
NCIH2085	0.0426443	2.98061
MFE296	0.516015	2.97634
GP2D	2.76977	#N/A
RCC10RGB	3.18903	6.51779
HCC95	0.163499	#N/A
IPC298	0.31034	2.98788
MOLP8	0.505891	2.1362
CORL105	0.722466	2.2546
NCIH520	1.89142	3.28827
NCIH1573	3.02503	4.17375
EM2	0	3.67817
NCIH841	0.823749	2.46026
8MGBA	2.23879	1.67813
EFO21	2.38681	4.4901
KNS60	0.124328	#N/A
NCIH322	0.298658	#N/A
TOV112D	0.111031	2.36818
NCIH460	0.799087	1.68718
MELJUSO	1.16993	2.47499
NUDHL1	0.0143553	#N/A
T47D	0.238787	4.73008
HCC1569	4.8515	4.75243
WM88	0.0976108	#N/A
SKNDZ	0.0426443	2.7295
SW1353	0.0703893	#N/A
HOP62	1.70044	1.59303
SNU899	0.124328	#N/A
CAPAN2	3.56925	4.57079
HS729	0.454176	#N/A
HS688AT	0.0143553	#N/A
SW620	1.98185	2.38163
EBC1	0.0285692	3.96959
ML1	0.238787	1.66557
SNU886	2.82985	#N/A
MDAMB435S	0.0143553	#N/A
SNU466	0.137504	#N/A
OC314	2.66903	1.81736
RT112	0.933573	2.48953
HT1080	0.0840643	2.08078
PLCPRF5	3.54473	#N/A
MIAPACA2	0.0143553	1.23554
SNU119	1.48026	#N/A
IGROV1	0.422233	2.7724
YD8	0.0143553	#N/A
ECC12	4.77136	#N/A
A2780	2.34483	1.57752
HCC1806	1.28096	1.93051
HCC1395	0.15056	2.82076
BCP1	0.400538	#N/A
CI1	0.0285692	#N/A
A253	0.0976108	2.16738
NCIH2228	3.14568	2.55169
MPP89	0.773996	1.85297
EOL1	1.57531	#N/A
SNU840	0.0285692	#N/A
NCIH1563	1.42761	3.27969
SNU423	0.31034	3.851
PANC0203	1.61824	3.6263
SNU398	2.5509	2.60654
PANC0504	2.02857	#N/A
MALME3M	0	#N/A
GSS	2.70929	#N/A
MKN45	1.9486	2.43631
CAL54	3.62644	2.38409
NCIH2106	0.0285692	#N/A
DKMG	0.536053	3.93243
GDM1	0.0143553	4.53178
LMSU	2.75916	#N/A
HCC1428	0.124328	5.07684
NCIH838	0	2.85261
NCIH196	2.09424	2.18648
KMBC2	0.367371	#N/A
SW1417	1.22651	4.51726
COLO800	0.0143553	2.5387
HCC2279	1.47508	#N/A
U266B1	0.176323	#N/A
BC3C	0.505891	#N/A
SNU869	2.54844	#N/A
OSRC2	2.18587	1.31694
BHT101	4.90352	1.20148
PK59	0.333424	#N/A
HEPG2	2.86196	#N/A
NCIH2087	1.41143	2.71469
SKMEL28	0.0565835	2.7242
HS936T	1.59455	#N/A
CAS1	0.495695	4.30836
KNS42	0.948601	3.08388
TE8	0.137504	2.36017
SUDHL4	0.0285692	3.46444
HUH1	2.14731	1.98593
NCIH358	1.5509	3.50842
KU812	0.0285692	2.96748
SNU478	1.02148	#N/A
KELLY	0.124328	2.6155
TCCSUP	0.0426443	2.09726
A172	0.0143553	3.43728
SUDHL1	0.0285692	#N/A
NCIH660	4.18031	#N/A
MSTO211H	2.11103	3.02963
AN3CA	0.0143553	2.05763
DETROIT562	0.739848	3.1153
SH10TC	0.0143553	#N/A
JURKAT	0.0143553	2.76598
SKM1	0.0840643	1.25663
SUPT1	0.0285692	2.84393
KMRC2	1.97085	#N/A
FADU	1.13093	2.32168
NCIH2110	0.238787	2.0916
2313287	3.49569	3.97943
DND41	0.286881	2.8665
OVCAR4	0.0976108	2.98398
NCIH2122	2.26604	2.51768
LUDLU1	0.400538	#N/A
PK45H	1.94111	#N/A
DLD1	1.01435	#N/A
MJ	1.4489	#N/A
BCPAP	0.226509	3.65399
NCIH1792	2.0321	2.36307
RERFLCMS	0.475085	3.20972
BT20	0	3.28479
HCC15	0.0976108	3.86953
NCIN87	2.37574	2.90262
NALM6	0.0143553	2.21757
SKUT1	0.650765	2.39533
SNU620	4.8268	#N/A
HCC33	0.0426443	#N/A
IM95	4.60466	4.27952
DBTRG05MG	0.0703893	2.69927
SNU16	4.05658	2.65256
MINO	0	#N/A
WM793	0.31034	#N/A
ISHIKAWAHERAKLIO02ER	0.871844	#N/A
HSC3	0.0143553	1.98956
HOP92	1.33914	1.0804
CORL95	0.226509	3.03415
HDMYZ	0.137504	#N/A
A4FUK	0.863939	2.11589
COLO201	2.20477	#N/A
SW48	3.37295	2.44993
BICR31	1.71809	#N/A
SNU213	1.7866	#N/A
CAL62	1.56072	2.79303
BL41	0	1.79916
JHH1	1.09085	4.09637
T3M10	1.5509	#N/A
NOMO1	2.17951	2.51248
CORL279	0.0285692	1.4683
DAOY	0.0426443	0.560409
MEWO	0.189034	3.12085
SNU1066	2.70044	#N/A
GRANTA519	0.226509	2.37963
CAL120	0.189034	3.84663
G401	0.0143553	2.1646
ONS76	0.713696	1.08848
NCIH2030	1.1375	2.34206
RH30	0.0143553	#N/A
RI1	0	#N/A
HS852T	0.823749	#N/A
COLO829	0.757023	2.08513
KMS26	1.8953	#N/A
MDAMB468	0.0285692	1.80607
A375	0.545968	1.04559
HCC2935	0.15056	#N/A
SW982	0.970854	2.01505
OV56	1.02148	0.824409
TUHR4TKB	3.01792	#N/A
NUGC3	0.275007	0.734391
ONCODG1	1.0072	#N/A
KYSE30	0.464668	#N/A
SKNBE2	0.925999	#N/A
NCIH1568	0.0976108	4.22251
HDLM2	0.250962	3.75528
SW1116	3.76765	4.38813
NCIH1694	0.176323	2.31546
M059K	0.0976108	#N/A
JHUEM2	0	#N/A
WSUDLCL2	0.0565835	3.5924
COLO741	0.137504	#N/A
SNU8	0.505891	#N/A
HT115	4.22497	3.95726
PATU8988T	1.95977	4.62605
JM1	0.0285692	1.48155
YAMATO	4.99277	#N/A
KYM1	0.0143553	1.36057
DMS79	0.0285692	2.96939
OCIAML2	0.773996	1.55493
KMS21BM	0.9855	#N/A
KP2	0.250962	4.50372
MOLM6	0	#N/A
LS411N	4.08746	3.86918
LU99	2.01436	#N/A
QGP1	2.38405	4.94762
PK1	0	#N/A
LN229	0.0143553	2.74779
NCIH2029	0.0143553	4.68548
BICR56	0.978196	#N/A
SNU46	0.970854	#N/A
TE15	1.32769	3.52909
SKMM2	3.30743	4.02512
COLO678	1.67356	4.93484
KARPAS299	0.0703893	2.23286
OVTOKO	0.823749	1.4918
JVM3	2.47249	1.8653
SNUC5	2.35614	2.7648
BICR22	0.847997	1.52444
SKNMC	3.78346	#N/A
LI7	4.06437	#N/A
OV90	2.29572	3.77764
NCIH2009	2.01078	3.70921
NCIH1793	0.863939	2.8356
SCLC21H	0.731183	#N/A
PC14	0.0426443	2.18278
SUDHL10	0.0426443	2.20998
SNU1076	1.51601	#N/A
A498	2.84398	3.1872
SNU387	0.0285692	3.0758
NCIH727	2.9855	4.26029
EHEB	2.40599	3.24594
NCIH1299	0.722466	3.08145
DMS454	3.94954	#N/A
DV90	2.56072	#N/A
SNU1272	2.33342	#N/A
SNUC4	4.27053	#N/A
RD	0	2.40208
MCAS	0	#N/A
HS683	2.03914	3.27115
SKMEL31	0.831877	3.53233
SNUC2A	0.137504	#N/A
YH13	0.903038	2.43985
ZR751	1.45418	#N/A
LNCAPCLONEFGC	0.632268	4.97841
HEC151	0.739848	#N/A
UACC257	0.0143553	3.67587
CORL47	0.31034	#N/A
TCCPAN2	3.10266	#N/A
L363	2.34483	1.94534
TE5	1.25096	2.91315
A2058	0.0143553	1.40568
SNU216	0.704872	#N/A
HEL9217	0.0143553	#N/A
OVCAR5	2.65535	1.30616
HEYA8	0.731183	#N/A
KG1C	0.895303	#N/A
REC1	0.0285692	#N/A
NCIH1581	2.5008	2.05029
F36P	0.0285692	#N/A
SUPT11	0	#N/A
BT549	0.464668	3.14311
SEM	1.68706	#N/A
JEKO1	0.0143553	3.49976
MOLP2	0.0840643	#N/A
RERFLCAD1	2.62059	#N/A
ST486	0.111031	3.60986
ALLSIL	0	2.33702
AML193	0.0426443	#N/A
TOV21G	1.86394	0.01415
NCIH23	0.111031	1.70877
NCIH1355	0.250962	1.84731
JHH6	0.432959	1.47027
SCC9	0.847997	3.48915
VCAP	1.80323	4.89457
NCIH2405	1.49569	3.02528
MDAMB361	0.275007	2.72507
HEC251	0.807355	#N/A
PSN1	0.0426443	0.572228
RKN	0.367371	2.61323
NCIH2023	3.20945	1.89658
SUPB15	0.0143553	1.39627
CMLT1	0.0976108	2.16852
NB4	0.0840643	1.10678
SNU475	1.56072	#N/A
NMCG1	0.163499	2.26527
ACHN	2.94111	2.0537
COLO792	0.0143553	1.57496
SU8686	2.60644	2.54655
BL70	0.0285692	#N/A
639V	0.545968	1.12277
LOXIMVI	1.44361	1.38618
TOLEDO	0.163499	#N/A
A673	0.263034	0.931652
		#N/A
		#N/A
		#N/A
		#N/A
		#N/A
		#N/A
		#N/A
		#N/A
		#N/A
		#N/A
		#N/A
		#N/A
		#N/A
		#N/A
		#N/A
		#N/A
		#N/A
		#N/A
		#N/A
		#N/A
		#N/A
		#N/A
		#N/A
		#N/A
		#N/A
		#N/A
		#N/A
		#N/A
		#N/A
		#N/A
		#N/A
		#N/A
		#N/A
		#N/A
		#N/A
		#N/A
		#N/A
		#N/A
		#N/A
		#N/A
		#N/A
		#N/A
		#N/A
		#N/A
		#N/A
		#N/A
		#N/A
		#N/A
		#N/A
		#N/A
		#N/A
		#N/A
		#N/A
		#N/A
		#N/A
		#N/A
		#N/A
		#N/A
		#N/A
		#N/A
		#N/A
		#N/A
		#N/A
		#N/A
		#N/A
		#N/A
		#N/A
		#N/A
		#N/A
		#N/A
		#N/A
		#N/A
		#N/A
		#N/A
		#N/A
		#N/A
		#N/A
		#N/A
		#N/A
		#N/A
		#N/A
		#N/A
		#N/A
		#N/A
		#N/A
		#N/A
		#N/A
		#N/A
		#N/A
		#N/A
		#N/A
		#N/A
		#N/A
		#N/A
		#N/A
		#N/A
		#N/A
		#N/A
		#N/A
		#N/A
		#N/A
		#N/A
		#N/A
		#N/A
		#N/A
		#N/A
		#N/A
		#N/A
		#N/A
		#N/A
		#N/A
		#N/A
		#N/A
		#N/A
		#N/A
		#N/A
		#N/A
		#N/A
		#N/A
		#N/A
		#N/A
		#N/A
		#N/A
		#N/A
		#N/A
		#N/A
		#N/A
		#N/A
		#N/A
		#N/A
		#N/A
		#N/A
		#N/A
		#N/A
		#N/A
		#N/A
		#N/A
		#N/A
		#N/A
		#N/A
		#N/A
		#N/A
		#N/A
		#N/A
		#N/A
		#N/A
		#N/A
		#N/A
		#N/A
		#N/A
		#N/A
		#N/A
		#N/A
		#N/A
		#N/A
		#N/A
		#N/A
		#N/A
		#N/A
		#N/A
		#N/A
		#N/A
		#N/A
		#N/A
		#N/A
		#N/A
		#N/A
		#N/A
		#N/A
		#N/A
		#N/A
		#N/A
		#N/A
		#N/A
		#N/A
		#N/A
		#N/A
		#N/A
		#N/A
		#N/A
		#N/A
		#N/A
		#N/A
		#N/A
		#N/A
		#N/A
		#N/A
		#N/A
		#N/A
		#N/A
		#N/A
		#N/A
		#N/A
		#N/A
		#N/A
		#N/A
		#N/A
		#N/A
		#N/A
		#N/A
		#N/A
		#N/A
		#N/A
		#N/A
		#N/A
		#N/A
		#N/A
		#N/A
		#N/A
		#N/A
		#N/A
		#N/A
		#N/A
		#N/A
		#N/A
		#N/A
		#N/A
		#N/A
		#N/A
		#N/A
		#N/A
		#N/A
		#N/A
		#N/A
		#N/A
		#N/A
		#N/A
		#N/A
		#N/A
		#N/A
		#N/A
		#N/A
		#N/A
		#N/A
		#N/A
		#N/A
		#N/A
		#N/A
		#N/A
		#N/A
		#N/A
		#N/A
		#N/A
		#N/A
		#N/A
		#N/A
		#N/A
		#N/A
		#N/A
		#N/A
		#N/A
		#N/A
		#N/A
		#N/A
		#N/A
		#N/A
		#N/A
		#N/A
		#N/A
		#N/A
		#N/A
		#N/A
		#N/A
		#N/A
		#N/A
		#N/A
		#N/A
		#N/A
		#N/A
		#N/A
		#N/A
		#N/A
		#N/A
		#N/A
		#N/A
		#N/A
		#N/A
		#N/A
		#N/A
		#N/A
		#N/A
		#N/A
		#N/A
		#N/A
		#N/A
		#N/A
		#N/A
		#N/A
		#N/A
		#N/A
		#N/A
		#N/A
		#N/A
		#N/A
		#N/A
		#N/A
		#N/A
		#N/A
		#N/A
		#N/A
		#N/A
		#N/A
		#N/A
		#N/A
		#N/A
		#N/A
		#N/A
		#N/A
		#N/A
		#N/A
		#N/A
		#N/A
		#N/A
		#N/A
		#N/A
		#N/A
		#N/A
		#N/A
		#N/A
		#N/A
		#N/A
		#N/A
		#N/A
		#N/A
		#N/A
		#N/A
		#N/A
		#N/A
		#N/A
		#N/A
		#N/A
		#N/A
		#N/A
		#N/A
		#N/A
		#N/A
		#N/A
		#N/A
		#N/A
		#N/A
		#N/A
		#N/A
		#N/A
		#N/A
		#N/A
		#N/A
		#N/A
		#N/A
		#N/A
		#N/A
		#N/A
		#N/A
		#N/A
		#N/A
		#N/A
		#N/A
		#N/A
		#N/A
		#N/A
		#N/A
		#N/A
		#N/A
		#N/A
		#N/A
		#N/A
		#N/A
		#N/A
		#N/A
		#N/A
		#N/A
		#N/A
		#N/A
		#N/A
		#N/A
		#N/A
		#N/A
		#N/A
		#N/A
		#N/A
		#N/A
		#N/A
		#N/A
		#N/A
		#N/A
		#N/A
		#N/A
		#N/A
		#N/A
		#N/A
		#N/A
		#N/A
		#N/A
		#N/A
		#N/A
		#N/A
		#N/A
		#N/A
		#N/A
		#N/A
		#N/A
		#N/A
		#N/A
		#N/A
		#N/A
		#N/A
		#N/A
		#N/A
		#N/A
		#N/A
		#N/A
		#N/A
		#N/A
		#N/A
		#N/A
		#N/A
		#N/A
		#N/A
		#N/A
		#N/A
		#N/A
		#N/A
		#N/A
		#N/A
		#N/A
		#N/A
		#N/A
		#N/A
		#N/A
		#N/A
		#N/A
		#N/A
		#N/A
		#N/A
		#N/A
		#N/A
		#N/A
		#N/A
		#N/A
		#N/A
		#N/A
		#N/A
		#N/A
		#N/A
		#N/A
		#N/A
		#N/A
		#N/A
		#N/A
		#N/A
		#N/A
		#N/A
		#N/A
		#N/A
		#N/A
		#N/A
		#N/A
		#N/A
		#N/A
		#N/A
		#N/A
		#N/A
		#N/A
		#N/A
		#N/A
		#N/A
		#N/A
		#N/A
		#N/A
		#N/A
		#N/A
		#N/A
		#N/A
		#N/A
		#N/A
		#N/A
		#N/A
		#N/A
		#N/A
		#N/A
		#N/A
		#N/A
		#N/A
		#N/A
		#N/A
		#N/A
		#N/A
		#N/A
		#N/A
		#N/A
		#N/A
		#N/A
		#N/A
		#N/A
		#N/A
		#N/A
		#N/A
		#N/A
		#N/A
		#N/A
		#N/A
		#N/A
		#N/A
		#N/A
		#N/A
		#N/A
		#N/A
		#N/A
		#N/A
		#N/A
		#N/A
		#N/A
		#N/A
		#N/A
		#N/A
		#N/A
		#N/A
		#N/A
		#N/A
		#N/A
		#N/A
		#N/A
		#N/A
		#N/A
		#N/A
		#N/A
		#N/A
		#N/A
		#N/A
		#N/A
		#N/A
		#N/A
		#N/A
		#N/A
		#N/A
		#N/A
		#N/A
		#N/A
		#N/A
		#N/A
		#N/A
		#N/A
		#N/A
		#N/A
		#N/A
		#N/A
		#N/A
		#N/A
		#N/A
		#N/A
		#N/A
		#N/A
		#N/A
		#N/A
		#N/A
		#N/A
		#N/A
		#N/A
		#N/A
		#N/A
		#N/A
		#N/A
		#N/A
		#N/A
		#N/A
		#N/A
		#N/A
		#N/A
		#N/A
		#N/A
		#N/A
		#N/A
		#N/A
		#N/A
		#N/A
		#N/A
		#N/A
		#N/A
		#N/A
		#N/A
		#N/A
		#N/A
		#N/A
		#N/A
		#N/A
		#N/A
		#N/A
		#N/A
		#N/A
		#N/A
		#N/A
		#N/A
		#N/A
		#N/A
		#N/A
		#N/A
		#N/A
		#N/A
		#N/A
		#N/A
		#N/A
		#N/A
		#N/A
		#N/A
		#N/A
		#N/A
		#N/A
		#N/A
		#N/A
		#N/A
		#N/A
		#N/A
		#N/A
		#N/A
		#N/A
		#N/A
		#N/A
		#N/A
		#N/A
		#N/A
		#N/A
		#N/A
		#N/A
		#N/A
		#N/A
		#N/A
		#N/A
		#N/A
		#N/A
		#N/A
		#N/A
		#N/A
		#N/A
		#N/A
		#N/A
		#N/A
		#N/A
		#N/A
		#N/A
		#N/A
		#N/A
		#N/A
		#N/A
		#N/A
		#N/A
		#N/A
		#N/A
		#N/A
		#N/A
		#N/A
		#N/A
		#N/A
		#N/A
		#N/A
		#N/A
		#N/A
		#N/A
		#N/A
		#N/A
		#N/A
		#N/A
		#N/A
		#N/A
		#N/A
		#N/A
		#N/A
		#N/A
		#N/A
		#N/A
		#N/A
		#N/A
		#N/A
		#N/A
		#N/A
		#N/A
		#N/A
		#N/A
		#N/A
		#N/A
		#N/A
		#N/A
		#N/A
		#N/A
		#N/A
		#N/A
		#N/A
		#N/A
		#N/A
		#N/A
		#N/A
		#N/A
		#N/A
		#N/A
		#N/A
		#N/A
		#N/A
		#N/A
		#N/A
		#N/A
		#N/A
		#N/A
		#N/A
		#N/A
		#N/A
		#N/A
		#N/A
		#N/A
		#N/A
		#N/A
		#N/A
		#N/A
		#N/A
		#N/A
		#N/A
		#N/A
		#N/A
		#N/A
		#N/A
		#N/A
		#N/A
		#N/A
		#N/A
		#N/A
		#N/A
		#N/A
		#N/A
		#N/A
		#N/A
		#N/A
		#N/A
		#N/A
		#N/A
		#N/A
		#N/A
		#N/A
		#N/A
		#N/A
		#N/A
		#N/A
		#N/A
		#N/A
		#N/A
		#N/A
		#N/A
		#N/A
		#N/A
		#N/A
		#N/A
		#N/A
		#N/A
		#N/A
		#N/A
		#N/A
		#N/A
		#N/A
		#N/A
		#N/A
		#N/A
		#N/A
		#N/A
		#N/A
		#N/A
		#N/A
		#N/A
		#N/A
		#N/A
		#N/A
		#N/A
		#N/A
		#N/A
		#N/A
		#N/A
		#N/A
		#N/A
		#N/A
		#N/A
		#N/A
		#N/A
		#N/A
		#N/A
		#N/A
		#N/A
		#N/A
		#N/A
		#N/A
		#N/A
		#N/A
		#N/A
		#N/A
		#N/A
		#N/A
		#N/A
		#N/A
		#N/A
		#N/A
		#N/A
		#N/A
		#N/A
		#N/A
		#N/A
		#N/A
		#N/A
		#N/A
		#N/A
		#N/A
		#N/A
		#N/A
		#N/A
		#N/A
		#N/A
		#N/A
		#N/A
		#N/A
		#N/A
		#N/A
		#N/A
		#N/A
		#N/A
		#N/A
		#N/A
		#N/A
		#N/A
		#N/A
		#N/A
		#N/A
		#N/A
		#N/A
		#N/A
		#N/A
		#N/A
		#N/A
		#N/A
		#N/A
		#N/A
		#N/A
		#N/A
		#N/A
		#N/A
		#N/A
		#N/A
		#N/A
		#N/A
		#N/A
		#N/A
		#N/A
		#N/A
		#N/A
		#N/A
		#N/A
		#N/A
		#N/A
		#N/A
		#N/A
		#N/A
		#N/A
		#N/A
		#N/A
		#N/A
		#N/A
		#N/A
		#N/A
		#N/A
		#N/A
		#N/A
		#N/A
		#N/A
		#N/A
		#N/A
		#N/A
		#N/A
		#N/A
		#N/A
		#N/A
		#N/A
		#N/A
		#N/A
		#N/A
		#N/A
		#N/A
		#N/A
		#N/A
		#N/A
		#N/A
		#N/A
		#N/A
		#N/A
		#N/A
		#N/A
		#N/A
		#N/A
		#N/A
		#N/A
		#N/A
		#N/A
		#N/A
		#N/A
		#N/A
		#N/A
		#N/A
		#N/A
		#N/A
		#N/A
		#N/A
		#N/A
		#N/A
		#N/A
		#N/A
		#N/A
		#N/A
		#N/A
		#N/A
		#N/A
		#N/A
		#N/A
		#N/A
		#N/A
		#N/A
		#N/A
		#N/A
		#N/A
		#N/A
		#N/A
		#N/A
		#N/A
		#N/A
		#N/A
		#N/A
		#N/A
		#N/A
		#N/A
		#N/A
		#N/A
		#N/A
		#N/A
		#N/A
		#N/A
		#N/A
		#N/A
		#N/A
		#N/A
		#N/A
		#N/A
		#N/A
		#N/A
		#N/A
		#N/A
		#N/A
		#N/A
		#N/A
		#N/A
		#N/A
		#N/A
		#N/A
		#N/A
		#N/A
		#N/A
		#N/A
		#N/A
		#N/A
		#N/A
		#N/A
		#N/A
		#N/A
		#N/A
		#N/A
		#N/A
		#N/A
		#N/A
		#N/A
		#N/A
		#N/A
		#N/A
		#N/A
		#N/A
		#N/A
		#N/A
		#N/A
		#N/A
		#N/A
		#N/A
		#N/A
		#N/A
		#N/A
		#N/A
		#N/A
		#N/A
		#N/A
		#N/A
		#N/A
		#N/A
		#N/A
		#N/A
		#N/A
		#N/A
		#N/A
		#N/A
		#N/A
		#N/A
		#N/A
		#N/A
		#N/A
		#N/A
		#N/A
		#N/A
		#N/A
		#N/A
		#N/A
		#N/A
		#N/A
		#N/A
		#N/A
		#N/A
		#N/A
		#N/A
		#N/A
		#N/A
		#N/A
		#N/A
		#N/A
		#N/A
		#N/A
		#N/A
		#N/A
		#N/A
		#N/A
		#N/A
		#N/A
		#N/A
		#N/A
		#N/A
		#N/A
		#N/A
		#N/A
		#N/A
		#N/A
		#N/A
		#N/A
		#N/A
		#N/A
		#N/A
		#N/A
		#N/A
		#N/A
		#N/A
		#N/A
		#N/A
		#N/A
		#N/A
		#N/A
		#N/A
		#N/A
		#N/A
		#N/A
		#N/A
		#N/A
		#N/A
		#N/A
		#N/A
		#N/A
		#N/A
		#N/A
		#N/A
		#N/A
		#N/A
		#N/A
		#N/A
		#N/A
		#N/A
		#N/A
		#N/A
		#N/A
		#N/A
		#N/A
		#N/A
		#N/A
		#N/A
		#N/A
		#N/A
		#N/A
		#N/A
		#N/A
		#N/A
		#N/A
		#N/A
		#N/A
		#N/A
		#N/A
		#N/A
		#N/A
		#N/A
		#N/A
		#N/A
		#N/A
		#N/A
		#N/A
		#N/A
		#N/A
		#N/A
		#N/A
		#N/A
		#N/A
		#N/A
		#N/A
		#N/A
		#N/A
		#N/A
		#N/A
		#N/A
		#N/A
		#N/A
		#N/A
		#N/A
		#N/A
		#N/A
		#N/A
		#N/A
		#N/A
		#N/A
		#N/A
		#N/A
		#N/A
		#N/A
		#N/A
		#N/A
		#N/A
		#N/A
		#N/A
		#N/A
		#N/A
		#N/A
		#N/A
		#N/A
		#N/A
		#N/A
		#N/A
		#N/A
		#N/A
		#N/A
		#N/A
		#N/A
		#N/A
		#N/A
		#N/A
		#N/A
		#N/A
		#N/A
		#N/A
		#N/A
		#N/A
		#N/A
		#N/A
		#N/A
		#N/A
		#N/A
		#N/A
		#N/A
		#N/A
		#N/A
		#N/A
		#N/A
		#N/A
		#N/A
		#N/A
		#N/A
		#N/A
		#N/A
		#N/A
		#N/A
		#N/A
		#N/A
		#N/A
		#N/A
		#N/A
		#N/A
		#N/A
		#N/A
		#N/A
		#N/A
[truncated: 14,384 more rows]
