# Supplementary material for: HNF4G increases cisplatin resistance in lung adenocarcinoma via the MAPK6/Akt pathway
Source: PeerJ. 2023 Mar 10;11:e14996. doi: 10.7717/peerj.14996 (PMC10010171; doi:10.7717/peerj.14996)
Supplement: Figure S2 [file peerj-11-14996-s002.xlsx]

## Sheet: A549-Results
Well	Well Position	Omit	Sample Name	Target Name	Task	Reporter	Quencher	CT	Ct Mean	Ct SD	Delta Ct Mean
1	A1	FALSE	A549-0uM-1	ACTB	UNKNOWN	SYBR	None	13.4026	13.4058	0.0579855
2	A2	FALSE	A549-0uM-2	ACTB	UNKNOWN	SYBR	None	14.4439	14.314	0.126197
3	A3	FALSE	A549-0uM-3	ACTB	UNKNOWN	SYBR	None	14.4119	14.3407	0.0616746
4	A4	FALSE	A549-2uM-1	ACTB	UNKNOWN	SYBR	None	12.4603	12.6818	0.192031
5	A5	FALSE	A549-2uM-2	ACTB	UNKNOWN	SYBR	None	12.7949	12.732	0.0605078
6	A6	FALSE	A549-2uM-3	ACTB	UNKNOWN	SYBR	None	13.3024	13.2231	0.150583
7	A7	FALSE	A549-4uM-1	ACTB	UNKNOWN	SYBR	None	13.8817	13.7576	0.107572
8	A8	FALSE	A549-4uM-2	ACTB	UNKNOWN	SYBR	None	14.3269	14.2022	0.115656
9	A9	FALSE	A549-4uM-3	ACTB	UNKNOWN	SYBR	None	14.2139	14.1187	0.0851717
10	A10	FALSE	A549-8uM-1	ACTB	UNKNOWN	SYBR	None	14.3508	14.2357	0.102325
11	A11	FALSE	A549-8uM-2	ACTB	UNKNOWN	SYBR	None	14.1014	14.0492	0.11133
12	A12	FALSE	A549-8uM-3	ACTB	UNKNOWN	SYBR	None	13.7988	13.7174	0.0785532
13	B1	FALSE	A549-0uM-1	ACTB	UNKNOWN	SYBR	None	13.3495	13.4058	0.0579855
14	B2	FALSE	A549-0uM-2	ACTB	UNKNOWN	SYBR	None	14.1919	14.314	0.126197
15	B3	FALSE	A549-0uM-3	ACTB	UNKNOWN	SYBR	None	14.3059	14.3407	0.0616746
16	B4	FALSE	A549-2uM-1	ACTB	UNKNOWN	SYBR	None	12.7836	12.6818	0.192031
17	B5	FALSE	A549-2uM-2	ACTB	UNKNOWN	SYBR	None	12.6742	12.732	0.0605078
18	B6	FALSE	A549-2uM-3	ACTB	UNKNOWN	SYBR	None	13.0495	13.2231	0.150583
19	B7	FALSE	A549-4uM-1	ACTB	UNKNOWN	SYBR	None	13.6899	13.7576	0.107572
20	B8	FALSE	A549-4uM-2	ACTB	UNKNOWN	SYBR	None	14.0985	14.2022	0.115656
21	B9	FALSE	A549-4uM-3	ACTB	UNKNOWN	SYBR	None	14.0926	14.1187	0.0851717
22	B10	FALSE	A549-8uM-1	ACTB	UNKNOWN	SYBR	None	14.2013	14.2357	0.102325
23	B11	FALSE	A549-8uM-2	ACTB	UNKNOWN	SYBR	None	14.1248	14.0492	0.11133
24	B12	FALSE	A549-8uM-3	ACTB	UNKNOWN	SYBR	None	13.6421	13.7174	0.0785532
25	C1	FALSE	A549-0uM-1	ACTB	UNKNOWN	SYBR	None	13.4654	13.4058	0.0579855
26	C2	FALSE	A549-0uM-2	ACTB	UNKNOWN	SYBR	None	14.3063	14.314	0.126197
27	C3	FALSE	A549-0uM-3	ACTB	UNKNOWN	SYBR	None	14.3043	14.3407	0.0616746
28	C4	FALSE	A549-2uM-1	ACTB	UNKNOWN	SYBR	None	12.8015	12.6818	0.192031
29	C5	FALSE	A549-2uM-2	ACTB	UNKNOWN	SYBR	None	12.727	12.732	0.0605078
30	C6	FALSE	A549-2uM-3	ACTB	UNKNOWN	SYBR	None	13.3176	13.2231	0.150583
31	C7	FALSE	A549-4uM-1	ACTB	UNKNOWN	SYBR	None	13.7014	13.7576	0.107572
32	C8	FALSE	A549-4uM-2	ACTB	UNKNOWN	SYBR	None	14.1813	14.2022	0.115656
33	C9	FALSE	A549-4uM-3	ACTB	UNKNOWN	SYBR	None	14.0497	14.1187	0.0851717
34	C10	FALSE	A549-8uM-1	ACTB	UNKNOWN	SYBR	None	14.1551	14.2357	0.102325
35	C11	FALSE	A549-8uM-2	ACTB	UNKNOWN	SYBR	None	13.9214	14.0492	0.11133
36	C12	FALSE	A549-8uM-3	ACTB	UNKNOWN	SYBR	None	13.7112	13.7174	0.0785532
37	D1	FALSE	A549-0uM-1	HNF4G	UNKNOWN	SYBR	None	20.3913	20.2331	0.170637	6.82732
38	D2	FALSE	A549-0uM-2	HNF4G	UNKNOWN	SYBR	None	21.0723	21.2501	0.181967	6.93606
39	D3	FALSE	A549-0uM-3	HNF4G	UNKNOWN	SYBR	None	21.4751	21.4079	0.0602895	7.06727
40	D4	FALSE	A549-2uM-1	HNF4G	UNKNOWN	SYBR	None	18.7536	18.8214	0.103373	6.13956
41	D5	FALSE	A549-2uM-2	HNF4G	UNKNOWN	SYBR	None	19.0506	19.0281	0.0734508	6.29605
42	D6	FALSE	A549-2uM-3	HNF4G	UNKNOWN	SYBR	None	19.0117	19.0219	0.0327536	5.79874
43	D7	FALSE	A549-4uM-1	HNF4G	UNKNOWN	SYBR	None	19.2642	19.2248	0.0341894	5.46713
44	D8	FALSE	A549-4uM-2	HNF4G	UNKNOWN	SYBR	None	20.0084	19.9748	0.0290775	5.77259
45	D9	FALSE	A549-4uM-3	HNF4G	UNKNOWN	SYBR	None	19.8752	19.6932	0.193696	5.57451
46	D10	FALSE	A549-8uM-1	HNF4G	UNKNOWN	SYBR	None	19.3512	19.1681	0.191202	4.9324
47	D11	FALSE	A549-8uM-2	HNF4G	UNKNOWN	SYBR	None	19.1443	19.1594	0.0280118	5.11023
48	D12	FALSE	A549-8uM-3	HNF4G	UNKNOWN	SYBR	None	18.7706	18.7518	0.0196838	5.03439
49	E1	FALSE	A549-0uM-1	HNF4G	UNKNOWN	SYBR	None	20.2558	20.2331	0.170637	6.82732
50	E2	FALSE	A549-0uM-2	HNF4G	UNKNOWN	SYBR	None	21.436	21.2501	0.181967	6.93606
51	E3	FALSE	A549-0uM-3	HNF4G	UNKNOWN	SYBR	None	21.3584	21.4079	0.0602895	7.06727
52	E4	FALSE	A549-2uM-1	HNF4G	UNKNOWN	SYBR	None	18.9404	18.8214	0.103373	6.13956
53	E5	FALSE	A549-2uM-2	HNF4G	UNKNOWN	SYBR	None	19.0877	19.0281	0.0734508	6.29605
54	E6	FALSE	A549-2uM-3	HNF4G	UNKNOWN	SYBR	None	19.0585	19.0219	0.0327536	5.79874
55	E7	FALSE	A549-4uM-1	HNF4G	UNKNOWN	SYBR	None	19.2029	19.2248	0.0341894	5.46713
56	E8	FALSE	A549-4uM-2	HNF4G	UNKNOWN	SYBR	None	19.958	19.9748	0.0290775	5.77259
57	E9	FALSE	A549-4uM-3	HNF4G	UNKNOWN	SYBR	None	19.7149	19.6932	0.193696	5.57451
58	E10	FALSE	A549-8uM-1	HNF4G	UNKNOWN	SYBR	None	19.1834	19.1681	0.191202	4.9324
59	E11	FALSE	A549-8uM-2	HNF4G	UNKNOWN	SYBR	None	19.1918	19.1594	0.0280118	5.11023
60	E12	FALSE	A549-8uM-3	HNF4G	UNKNOWN	SYBR	None	18.7314	18.7518	0.0196838	5.03439
61	F1	FALSE	A549-0uM-1	HNF4G	UNKNOWN	SYBR	None	20.0523	20.2331	0.170637	6.82732
62	F2	FALSE	A549-0uM-2	HNF4G	UNKNOWN	SYBR	None	21.2419	21.2501	0.181967	6.93606
63	F3	FALSE	A549-0uM-3	HNF4G	UNKNOWN	SYBR	None	21.3904	21.4079	0.0602895	7.06727
64	F4	FALSE	A549-2uM-1	HNF4G	UNKNOWN	SYBR	None	18.7702	18.8214	0.103373	6.13956
65	F5	FALSE	A549-2uM-2	HNF4G	UNKNOWN	SYBR	None	18.946	19.0281	0.0734508	6.29605
66	F6	FALSE	A549-2uM-3	HNF4G	UNKNOWN	SYBR	None	18.9954	19.0219	0.0327536	5.79874
67	F7	FALSE	A549-4uM-1	HNF4G	UNKNOWN	SYBR	None	19.2072	19.2248	0.0341894	5.46713
68	F8	FALSE	A549-4uM-2	HNF4G	UNKNOWN	SYBR	None	19.958	19.9748	0.0290775	5.77259
69	F9	FALSE	A549-4uM-3	HNF4G	UNKNOWN	SYBR	None	19.4896	19.6932	0.193696	5.57451
70	F10	FALSE	A549-8uM-1	HNF4G	UNKNOWN	SYBR	None	18.9697	19.1681	0.191202	4.9324
71	F11	FALSE	A549-8uM-2	HNF4G	UNKNOWN	SYBR	None	19.1423	19.1594	0.0280118	5.11023
72	F12	FALSE	A549-8uM-3	HNF4G	UNKNOWN	SYBR	None	18.7533	18.7518	0.0196838	5.03439

## Sheet: HCC827-Results
Well	Well Position	Omit	Sample Name	Target Name	Task	Reporter	Quencher	CT	Ct Mean	Ct SD	Delta Ct Mean
1	A1	FALSE	HCC827-0uM-1	ACTB	UNKNOWN	SYBR	None	16.0483	15.9466	0.0897372
2	A2	FALSE	HCC827-0uM-2	ACTB	UNKNOWN	SYBR	None	14.8804	14.8416	0.152254
3	A3	FALSE	HCC827-0uM-3	ACTB	UNKNOWN	SYBR	None	14.9492	14.9272	0.102011
4	A4	FALSE	HCC827-2uM-1	ACTB	UNKNOWN	SYBR	None	15.7618	15.7439	0.186519
5	A5	FALSE	HCC827-2uM-2	ACTB	UNKNOWN	SYBR	None	15.7437	15.6375	0.154324
6	A6	FALSE	HCC827-2uM-3	ACTB	UNKNOWN	SYBR	None	15.5223	15.4521	0.135289
7	A7	FALSE	HCC827-4uM-1	ACTB	UNKNOWN	SYBR	None	15.1451	15.0857	0.0772629
8	A8	FALSE	HCC827-4uM-2	ACTB	UNKNOWN	SYBR	None	14.6384	14.4842	0.135087
9	A9	FALSE	HCC827-4uM-3	ACTB	UNKNOWN	SYBR	None	14.6009	14.5794	0.0186749
10	A10	FALSE	HCC827-8uM-1	ACTB	UNKNOWN	SYBR	None	14.9923	14.8123	0.269858
11	A11	FALSE	HCC827-8uM-2	ACTB	UNKNOWN	SYBR	None	14.7428	14.7187	0.029257
12	A12	FALSE	HCC827-8uM-3	ACTB	UNKNOWN	SYBR	None	14.8098	14.7161	0.0926387
13	B1	FALSE	HCC827-0uM-1	ACTB	UNKNOWN	SYBR	None	15.9127	15.9466	0.0897372
14	B2	FALSE	HCC827-0uM-2	ACTB	UNKNOWN	SYBR	None	14.9706	14.8416	0.152254
15	B3	FALSE	HCC827-0uM-3	ACTB	UNKNOWN	SYBR	None	15.0164	14.9272	0.102011
16	B4	FALSE	HCC827-2uM-1	ACTB	UNKNOWN	SYBR	None	15.9208	15.7439	0.186519
17	B5	FALSE	HCC827-2uM-2	ACTB	UNKNOWN	SYBR	None	15.7083	15.6375	0.154324
18	B6	FALSE	HCC827-2uM-3	ACTB	UNKNOWN	SYBR	None	15.5378	15.4521	0.135289
19	B7	FALSE	HCC827-4uM-1	ACTB	UNKNOWN	SYBR	None	15.1137	15.0857	0.0772629
20	B8	FALSE	HCC827-4uM-2	ACTB	UNKNOWN	SYBR	None	14.4272	14.4842	0.135087
21	B9	FALSE	HCC827-4uM-3	ACTB	UNKNOWN	SYBR	None	14.57	14.5794	0.0186749
22	B10	FALSE	HCC827-8uM-1	ACTB	UNKNOWN	SYBR	None	14.9426	14.8123	0.269858
23	B11	FALSE	HCC827-8uM-2	ACTB	UNKNOWN	SYBR	None	14.6861	14.7187	0.029257
24	B12	FALSE	HCC827-8uM-3	ACTB	UNKNOWN	SYBR	None	14.6245	14.7161	0.0926387
25	C1	FALSE	HCC827-0uM-1	ACTB	UNKNOWN	SYBR	None	15.8787	15.9466	0.0897372
26	C2	FALSE	HCC827-0uM-2	ACTB	UNKNOWN	SYBR	None	14.6737	14.8416	0.152254
27	C3	FALSE	HCC827-0uM-3	ACTB	UNKNOWN	SYBR	None	14.816	14.9272	0.102011
28	C4	FALSE	HCC827-2uM-1	ACTB	UNKNOWN	SYBR	None	15.5491	15.7439	0.186519
29	C5	FALSE	HCC827-2uM-2	ACTB	UNKNOWN	SYBR	None	15.4605	15.6375	0.154324
30	C6	FALSE	HCC827-2uM-3	ACTB	UNKNOWN	SYBR	None	15.2961	15.4521	0.135289
31	C7	FALSE	HCC827-4uM-1	ACTB	UNKNOWN	SYBR	None	14.9984	15.0857	0.0772629
32	C8	FALSE	HCC827-4uM-2	ACTB	UNKNOWN	SYBR	None	14.3869	14.4842	0.135087
33	C9	FALSE	HCC827-4uM-3	ACTB	UNKNOWN	SYBR	None	14.5673	14.5794	0.0186749
34	C10	FALSE	HCC827-8uM-1	ACTB	UNKNOWN	SYBR	None	14.502	14.8123	0.269858
35	C11	FALSE	HCC827-8uM-2	ACTB	UNKNOWN	SYBR	None	14.7272	14.7187	0.029257
36	C12	FALSE	HCC827-8uM-3	ACTB	UNKNOWN	SYBR	None	14.7142	14.7161	0.0926387
37	D1	FALSE	HCC827-0uM-1	HNF4G	UNKNOWN	SYBR	None	23.4195	23.4045	0.108375	7.45793
38	D2	FALSE	HCC827-0uM-2	HNF4G	UNKNOWN	SYBR	None	22.5818	22.5696	0.0376491	7.72802
39	D3	FALSE	HCC827-0uM-3	HNF4G	UNKNOWN	SYBR	None	22.5115	22.5238	0.0180905	7.59666
40	D4	FALSE	HCC827-2uM-1	HNF4G	UNKNOWN	SYBR	None	22.2526	22.265	0.115423	6.52115
41	D5	FALSE	HCC827-2uM-2	HNF4G	UNKNOWN	SYBR	None	22.4691	22.5091	0.0417326	6.87157
42	D6	FALSE	HCC827-2uM-3	HNF4G	UNKNOWN	SYBR	None	22.2784	22.3851	0.0929547	6.93304
43	D7	FALSE	HCC827-4uM-1	HNF4G	UNKNOWN	SYBR	None	21.4934	21.3451	0.139362	6.25944
44	D8	FALSE	HCC827-4uM-2	HNF4G	UNKNOWN	SYBR	None	20.9084	20.8957	0.0233196	6.41156
45	D9	FALSE	HCC827-4uM-3	HNF4G	UNKNOWN	SYBR	None	20.8793	20.8894	0.091324	6.31005
46	D10	FALSE	HCC827-8uM-1	HNF4G	UNKNOWN	SYBR	None	20.5052	20.5095	0.0641815	5.69719
47	D11	FALSE	HCC827-8uM-2	HNF4G	UNKNOWN	SYBR	None	20.2397	20.2162	0.0245664	5.49744
48	D12	FALSE	HCC827-8uM-3	HNF4G	UNKNOWN	SYBR	None	20.3791	20.289	0.0822779	5.57281
49	E1	FALSE	HCC827-0uM-1	HNF4G	UNKNOWN	SYBR	None	23.5046	23.4045	0.108375	7.45793
50	E2	FALSE	HCC827-0uM-2	HNF4G	UNKNOWN	SYBR	None	22.5274	22.5696	0.0376491	7.72802
51	E3	FALSE	HCC827-0uM-3	HNF4G	UNKNOWN	SYBR	None	22.5446	22.5238	0.0180905	7.59666
52	E4	FALSE	HCC827-2uM-1	HNF4G	UNKNOWN	SYBR	None	22.1564	22.265	0.115423	6.52115
53	E5	FALSE	HCC827-2uM-2	HNF4G	UNKNOWN	SYBR	None	22.5524	22.5091	0.0417326	6.87157
54	E6	FALSE	HCC827-2uM-3	HNF4G	UNKNOWN	SYBR	None	22.4482	22.3851	0.0929547	6.93304
55	E7	FALSE	HCC827-4uM-1	HNF4G	UNKNOWN	SYBR	None	21.3252	21.3451	0.139362	6.25944
56	E8	FALSE	HCC827-4uM-2	HNF4G	UNKNOWN	SYBR	None	20.91	20.8957	0.0233196	6.41156
57	E9	FALSE	HCC827-4uM-3	HNF4G	UNKNOWN	SYBR	None	20.8036	20.8894	0.091324	6.31005
58	E10	FALSE	HCC827-8uM-1	HNF4G	UNKNOWN	SYBR	None	20.5757	20.5095	0.0641815	5.69719
59	E11	FALSE	HCC827-8uM-2	HNF4G	UNKNOWN	SYBR	None	20.1907	20.2162	0.0245664	5.49744
60	E12	FALSE	HCC827-8uM-3	HNF4G	UNKNOWN	SYBR	None	20.2179	20.289	0.0822779	5.57281
61	F1	FALSE	HCC827-0uM-1	HNF4G	UNKNOWN	SYBR	None	23.2894	23.4045	0.108375	7.45793
62	F2	FALSE	HCC827-0uM-2	HNF4G	UNKNOWN	SYBR	None	22.5997	22.5696	0.0376491	7.72802
63	F3	FALSE	HCC827-0uM-3	HNF4G	UNKNOWN	SYBR	None	22.5154	22.5238	0.0180905	7.59666
64	F4	FALSE	HCC827-2uM-1	HNF4G	UNKNOWN	SYBR	None	22.3862	22.265	0.115423	6.52115
65	F5	FALSE	HCC827-2uM-2	HNF4G	UNKNOWN	SYBR	None	22.5056	22.5091	0.0417326	6.87157
66	F6	FALSE	HCC827-2uM-3	HNF4G	UNKNOWN	SYBR	None	22.4287	22.3851	0.0929547	6.93304
67	F7	FALSE	HCC827-4uM-1	HNF4G	UNKNOWN	SYBR	None	21.2168	21.3451	0.139362	6.25944
68	F8	FALSE	HCC827-4uM-2	HNF4G	UNKNOWN	SYBR	None	20.8688	20.8957	0.0233196	6.41156
69	F9	FALSE	HCC827-4uM-3	HNF4G	UNKNOWN	SYBR	None	20.9854	20.8894	0.091324	6.31005
70	F10	FALSE	HCC827-8uM-1	HNF4G	UNKNOWN	SYBR	None	20.4475	20.5095	0.0641815	5.69719
71	F11	FALSE	HCC827-8uM-2	HNF4G	UNKNOWN	SYBR	None	20.2181	20.2162	0.0245664	5.49744
72	F12	FALSE	HCC827-8uM-3	HNF4G	UNKNOWN	SYBR	None	20.2698	20.289	0.0822779	5.57281
