# Supplementary material for: HNF4G increases cisplatin resistance in lung adenocarcinoma via the MAPK6/Akt pathway
Source: PeerJ. 2023 Mar 10;11:e14996. doi: 10.7717/peerj.14996 (PMC10010171; doi:10.7717/peerj.14996)
Supplement: Figure S3 [file peerj-11-14996-s005.xlsx]

## Sheet: A549
Well	Well Position	Omit	Sample Name	Target Name	Task	Reporter	Quencher	CT	Ct Mean	Ct SD	Delta Ct Mean
1	A1	FALSE	NC-1	ACTB	UNKNOWN	SYBR	None	13.0705	13.003	0.310317
2	A2	FALSE	NC-2	ACTB	UNKNOWN	SYBR	None	13.6451	14.0674	0.408415
3	A3	FALSE	NC-3	ACTB	UNKNOWN	SYBR	None	14.1914	13.7733	0.414241
4	A4	FALSE	OE-1	ACTB	UNKNOWN	SYBR	None	12.1842	12.2573	0.0884487
5	A5	FALSE	OE-2	ACTB	UNKNOWN	SYBR	None	13.4759	13.2622	0.214745
6	A6	FALSE	OE-3	ACTB	UNKNOWN	SYBR	None	13.0393	13.2857	0.21377
7	A7	FALSE	SH1-1	ACTB	UNKNOWN	SYBR	None	14.1095	13.8674	0.303492
8	A8	FALSE	SH1-2	ACTB	UNKNOWN	SYBR	None	13.9532	13.9139	0.0425521
9	A9	FALSE	SH1-3	ACTB	UNKNOWN	SYBR	None	13.6396	13.555	0.161832
10	A10	FALSE	SH2-1	ACTB	UNKNOWN	SYBR	None	13.542	13.605	0.288048
11	A11	FALSE	SH2-2	ACTB	UNKNOWN	SYBR	None	14.213	14.2061	0.111713
12	A12	FALSE	SH2-3	ACTB	UNKNOWN	SYBR	None	12.9453	13.0908	0.144606
13	B1	FALSE	NC-1	ACTB	UNKNOWN	SYBR	None	13.274	13.003	0.310317
14	B2	FALSE	NC-2	ACTB	UNKNOWN	SYBR	None	14.4604	14.0674	0.408415
15	B3	FALSE	NC-3	ACTB	UNKNOWN	SYBR	None	13.3631	13.7733	0.414241
16	B4	FALSE	OE-1	ACTB	UNKNOWN	SYBR	None	12.2321	12.2573	0.0884487
17	B5	FALSE	OE-2	ACTB	UNKNOWN	SYBR	None	13.2644	13.2622	0.214745
18	B6	FALSE	OE-3	ACTB	UNKNOWN	SYBR	None	13.4215	13.2857	0.21377
19	B7	FALSE	SH1-1	ACTB	UNKNOWN	SYBR	None	13.5269	13.8674	0.303492
20	B8	FALSE	SH1-2	ACTB	UNKNOWN	SYBR	None	13.8687	13.9139	0.0425521
21	B9	FALSE	SH1-3	ACTB	UNKNOWN	SYBR	None	13.657	13.555	0.161832
22	B10	FALSE	SH2-1	ACTB	UNKNOWN	SYBR	None	13.9194	13.605	0.288048
23	B11	FALSE	SH2-2	ACTB	UNKNOWN	SYBR	None	14.091	14.2061	0.111713
24	B12	FALSE	SH2-3	ACTB	UNKNOWN	SYBR	None	13.0927	13.0908	0.144606
25	C1	FALSE	NC-1	ACTB	UNKNOWN	SYBR	None	12.6645	13.003	0.310317
26	C2	FALSE	NC-2	ACTB	UNKNOWN	SYBR	None	14.0966	14.0674	0.408415
27	C3	FALSE	NC-3	ACTB	UNKNOWN	SYBR	None	13.7653	13.7733	0.414241
28	C4	FALSE	OE-1	ACTB	UNKNOWN	SYBR	None	12.3556	12.2573	0.0884487
29	C5	FALSE	OE-2	ACTB	UNKNOWN	SYBR	None	13.0464	13.2622	0.214745
30	C6	FALSE	OE-3	ACTB	UNKNOWN	SYBR	None	13.3964	13.2857	0.21377
31	C7	FALSE	SH1-1	ACTB	UNKNOWN	SYBR	None	13.9658	13.8674	0.303492
32	C8	FALSE	SH1-2	ACTB	UNKNOWN	SYBR	None	13.9198	13.9139	0.0425521
33	C9	FALSE	SH1-3	ACTB	UNKNOWN	SYBR	None	13.3684	13.555	0.161832
34	C10	FALSE	SH2-1	ACTB	UNKNOWN	SYBR	None	13.3537	13.605	0.288048
35	C11	FALSE	SH2-2	ACTB	UNKNOWN	SYBR	None	14.3142	14.2061	0.111713
36	C12	FALSE	SH2-3	ACTB	UNKNOWN	SYBR	None	13.2345	13.0908	0.144606
37	D1	FALSE	NC-1	MAPK6	UNKNOWN	SYBR	None	19.7773	19.9039	0.167438	6.90091
38	D2	FALSE	NC-2	MAPK6	UNKNOWN	SYBR	None	21.4321	21.213	0.26947	7.14557
39	D3	FALSE	NC-3	MAPK6	UNKNOWN	SYBR	None	20.6544	20.8965	0.392488	7.12321
40	D4	FALSE	OE-1	MAPK6	UNKNOWN	SYBR	None	18.8945	18.5083	0.338552	6.25096
41	D5	FALSE	OE-2	MAPK6	UNKNOWN	SYBR	None	19.108	19.0925	0.159073	5.83027
42	D6	FALSE	OE-3	MAPK6	UNKNOWN	SYBR	None	19.0979	19.1899	0.0871844	5.90418
43	D7	FALSE	SH1-1	MAPK6	UNKNOWN	SYBR	None	21.0203	21.3382	0.359804	7.47078
44	D8	FALSE	SH1-2	MAPK6	UNKNOWN	SYBR	None	21.9649	21.8216	0.231959	7.90777
45	D9	FALSE	SH1-3	MAPK6	UNKNOWN	SYBR	None	21.1478	21.1784	0.066278	7.62341
46	D10	FALSE	SH2-1	MAPK6	UNKNOWN	SYBR	None	21.6639	21.576	0.394439	7.97095
47	D11	FALSE	SH2-2	MAPK6	UNKNOWN	SYBR	None	21.7933	21.7432	0.269129	7.53717
48	D12	FALSE	SH2-3	MAPK6	UNKNOWN	SYBR	None	20.9576	21.0775	0.281631	7.98672
49	E1	FALSE	NC-1	MAPK6	UNKNOWN	SYBR	None	20.0937	19.9039	0.167438	6.90091
50	E2	FALSE	NC-2	MAPK6	UNKNOWN	SYBR	None	20.9121	21.213	0.26947	7.14557
51	E3	FALSE	NC-3	MAPK6	UNKNOWN	SYBR	None	21.3493	20.8965	0.392488	7.12321
52	E4	FALSE	OE-1	MAPK6	UNKNOWN	SYBR	None	18.263	18.5083	0.338552	6.25096
53	E5	FALSE	OE-2	MAPK6	UNKNOWN	SYBR	None	18.9263	19.0925	0.159073	5.83027
54	E6	FALSE	OE-3	MAPK6	UNKNOWN	SYBR	None	19.2713	19.1899	0.0871844	5.90418
55	E7	FALSE	SH1-1	MAPK6	UNKNOWN	SYBR	None	21.7288	21.3382	0.359804	7.47078
56	E8	FALSE	SH1-2	MAPK6	UNKNOWN	SYBR	None	21.554	21.8216	0.231959	7.90777
57	E9	FALSE	SH1-3	MAPK6	UNKNOWN	SYBR	None	21.2545	21.1784	0.066278	7.62341
58	E10	FALSE	SH2-1	MAPK6	UNKNOWN	SYBR	None	21.919	21.576	0.394439	7.97095
59	E11	FALSE	SH2-2	MAPK6	UNKNOWN	SYBR	None	21.4526	21.7432	0.269129	7.53717
60	E12	FALSE	SH2-3	MAPK6	UNKNOWN	SYBR	None	20.8757	21.0775	0.281631	7.98672
61	F1	FALSE	NC-1	MAPK6	UNKNOWN	SYBR	None	19.8406	19.9039	0.167438	6.90091
62	F2	FALSE	NC-2	MAPK6	UNKNOWN	SYBR	None	21.2946	21.213	0.26947	7.14557
63	F3	FALSE	NC-3	MAPK6	UNKNOWN	SYBR	None	20.6857	20.8965	0.392488	7.12321
64	F4	FALSE	OE-1	MAPK6	UNKNOWN	SYBR	None	18.3673	18.5083	0.338552	6.25096
65	F5	FALSE	OE-2	MAPK6	UNKNOWN	SYBR	None	19.2433	19.0925	0.159073	5.83027
66	F6	FALSE	OE-3	MAPK6	UNKNOWN	SYBR	None	19.2006	19.1899	0.0871844	5.90418
67	F7	FALSE	SH1-1	MAPK6	UNKNOWN	SYBR	None	21.2655	21.3382	0.359804	7.47078
68	F8	FALSE	SH1-2	MAPK6	UNKNOWN	SYBR	None	21.946	21.8216	0.231959	7.90777
69	F9	FALSE	SH1-3	MAPK6	UNKNOWN	SYBR	None	21.133	21.1784	0.066278	7.62341
70	F10	FALSE	SH2-1	MAPK6	UNKNOWN	SYBR	None	21.145	21.576	0.394439	7.97095
71	F11	FALSE	SH2-2	MAPK6	UNKNOWN	SYBR	None	21.9838	21.7432	0.269129	7.53717
72	F12	FALSE	SH2-3	MAPK6	UNKNOWN	SYBR	None	21.3993	21.0775	0.281631	7.98672

## Sheet: HCC827
Well	Well Position	Omit	Sample Name	Target Name	Task	Reporter	Quencher	CT	Ct Mean	Ct SD	Delta Ct Mean
1	A1	FALSE	NC-1	ACTB	UNKNOWN	SYBR	None	15.2368	15.2148	0.0639737
2	A2	FALSE	NC-2	ACTB	UNKNOWN	SYBR	None	15.4786	15.4958	0.267752
3	A3	FALSE	NC-3	ACTB	UNKNOWN	SYBR	None	14.528	14.5514	0.0716374
4	A4	FALSE	OE-1	ACTB	UNKNOWN	SYBR	None	14.696	14.7429	0.248213
5	A5	FALSE	OE-2	ACTB	UNKNOWN	SYBR	None	13.8888	14.029	0.331136
6	A6	FALSE	OE-3	ACTB	UNKNOWN	SYBR	None	14.8775	14.7792	0.129927
7	A7	FALSE	SH1-1	ACTB	UNKNOWN	SYBR	None	15.1014	15.1972	0.355766
8	A8	FALSE	SH1-2	ACTB	UNKNOWN	SYBR	None	15.0819	15.3362	0.270758
9	A9	FALSE	SH1-3	ACTB	UNKNOWN	SYBR	None	14.3198	14.7229	0.360857
10	A10	FALSE	SH2-1	ACTB	UNKNOWN	SYBR	None	15.7406	15.5466	0.239556
11	A11	FALSE	SH2-2	ACTB	UNKNOWN	SYBR	None	15.3011	15.3449	0.403143
12	A12	FALSE	SH2-3	ACTB	UNKNOWN	SYBR	None	14.7571	14.8159	0.256177
13	B1	FALSE	NC-1	ACTB	UNKNOWN	SYBR	None	15.1427	15.2148	0.0639737
14	B2	FALSE	NC-2	ACTB	UNKNOWN	SYBR	None	15.7717	15.4958	0.267752
15	B3	FALSE	NC-3	ACTB	UNKNOWN	SYBR	None	14.6318	14.5514	0.0716374
16	B4	FALSE	OE-1	ACTB	UNKNOWN	SYBR	None	14.5215	14.7429	0.248213
17	B5	FALSE	OE-2	ACTB	UNKNOWN	SYBR	None	14.4072	14.029	0.331136
18	B6	FALSE	OE-3	ACTB	UNKNOWN	SYBR	None	14.6319	14.7792	0.129927
19	B7	FALSE	SH1-1	ACTB	UNKNOWN	SYBR	None	15.591	15.1972	0.355766
20	B8	FALSE	SH1-2	ACTB	UNKNOWN	SYBR	None	15.6208	15.3362	0.270758
21	B9	FALSE	SH1-3	ACTB	UNKNOWN	SYBR	None	15.0159	14.7229	0.360857
22	B10	FALSE	SH2-1	ACTB	UNKNOWN	SYBR	None	15.2788	15.5466	0.239556
23	B11	FALSE	SH2-2	ACTB	UNKNOWN	SYBR	None	14.9654	15.3449	0.403143
24	B12	FALSE	SH2-3	ACTB	UNKNOWN	SYBR	None	14.5943	14.8159	0.256177
25	C1	FALSE	NC-1	ACTB	UNKNOWN	SYBR	None	15.2649	15.2148	0.0639737
26	C2	FALSE	NC-2	ACTB	UNKNOWN	SYBR	None	15.237	15.4958	0.267752
27	C3	FALSE	NC-3	ACTB	UNKNOWN	SYBR	None	14.4943	14.5514	0.0716374
28	C4	FALSE	OE-1	ACTB	UNKNOWN	SYBR	None	15.0112	14.7429	0.248213
29	C5	FALSE	OE-2	ACTB	UNKNOWN	SYBR	None	13.791	14.029	0.331136
30	C6	FALSE	OE-3	ACTB	UNKNOWN	SYBR	None	14.8282	14.7792	0.129927
31	C7	FALSE	SH1-1	ACTB	UNKNOWN	SYBR	None	14.8991	15.1972	0.355766
32	C8	FALSE	SH1-2	ACTB	UNKNOWN	SYBR	None	15.3059	15.3362	0.270758
33	C9	FALSE	SH1-3	ACTB	UNKNOWN	SYBR	None	14.8329	14.7229	0.360857
34	C10	FALSE	SH2-1	ACTB	UNKNOWN	SYBR	None	15.6204	15.5466	0.239556
35	C11	FALSE	SH2-2	ACTB	UNKNOWN	SYBR	None	15.7681	15.3449	0.403143
36	C12	FALSE	SH2-3	ACTB	UNKNOWN	SYBR	None	15.0964	14.8159	0.256177
37	D1	FALSE	NC-1	MAPK6	UNKNOWN	SYBR	None	21.7691	21.4136	0.318893	6.19885
38	D2	FALSE	NC-2	MAPK6	UNKNOWN	SYBR	None	21.4901	21.8565	0.372455	6.36075
39	D3	FALSE	NC-3	MAPK6	UNKNOWN	SYBR	None	21.0217	20.9875	0.134484	6.43614
40	D4	FALSE	OE-1	MAPK6	UNKNOWN	SYBR	None	20.5818	20.548	0.0695584	5.80508
41	D5	FALSE	OE-2	MAPK6	UNKNOWN	SYBR	None	19.7879	19.727	0.260176	5.69805
42	D6	FALSE	OE-3	MAPK6	UNKNOWN	SYBR	None	20.4215	20.4137	0.287442	5.63449
43	D7	FALSE	SH1-1	MAPK6	UNKNOWN	SYBR	None	22.1837	22.0265	0.159018	6.82934
44	D8	FALSE	SH1-2	MAPK6	UNKNOWN	SYBR	None	22.143	22.0184	0.265568	6.68224
45	D9	FALSE	SH1-3	MAPK6	UNKNOWN	SYBR	None	21.8976	21.6698	0.233547	6.94691
46	D10	FALSE	SH2-1	MAPK6	UNKNOWN	SYBR	None	21.9402	22.2529	0.285649	6.7063
47	D11	FALSE	SH2-2	MAPK6	UNKNOWN	SYBR	None	22.4003	22.3059	0.082208	6.96107
48	D12	FALSE	SH2-3	MAPK6	UNKNOWN	SYBR	None	21.806	21.8174	0.301439	7.00149
49	E1	FALSE	NC-1	MAPK6	UNKNOWN	SYBR	None	21.1527	21.4136	0.318893	6.19885
50	E2	FALSE	NC-2	MAPK6	UNKNOWN	SYBR	None	22.2348	21.8565	0.372455	6.36075
51	E3	FALSE	NC-3	MAPK6	UNKNOWN	SYBR	None	20.8392	20.9875	0.134484	6.43614
52	E4	FALSE	OE-1	MAPK6	UNKNOWN	SYBR	None	20.468	20.548	0.0695584	5.80508
53	E5	FALSE	OE-2	MAPK6	UNKNOWN	SYBR	None	19.9514	19.727	0.260176	5.69805
54	E6	FALSE	OE-3	MAPK6	UNKNOWN	SYBR	None	20.6971	20.4137	0.287442	5.63449
55	E7	FALSE	SH1-1	MAPK6	UNKNOWN	SYBR	None	21.8657	22.0265	0.159018	6.82934
56	E8	FALSE	SH1-2	MAPK6	UNKNOWN	SYBR	None	21.7135	22.0184	0.265568	6.68224
57	E9	FALSE	SH1-3	MAPK6	UNKNOWN	SYBR	None	21.6808	21.6698	0.233547	6.94691
58	E10	FALSE	SH2-1	MAPK6	UNKNOWN	SYBR	None	22.3183	22.2529	0.285649	6.7063
59	E11	FALSE	SH2-2	MAPK6	UNKNOWN	SYBR	None	22.2495	22.3059	0.082208	6.96107
60	E12	FALSE	SH2-3	MAPK6	UNKNOWN	SYBR	None	21.5219	21.8174	0.301439	7.00149
61	F1	FALSE	NC-1	MAPK6	UNKNOWN	SYBR	None	21.3191	21.4136	0.318893	6.19885
62	F2	FALSE	NC-2	MAPK6	UNKNOWN	SYBR	None	21.8447	21.8565	0.372455	6.36075
63	F3	FALSE	NC-3	MAPK6	UNKNOWN	SYBR	None	21.1016	20.9875	0.134484	6.43614
64	F4	FALSE	OE-1	MAPK6	UNKNOWN	SYBR	None	20.5942	20.548	0.0695584	5.80508
65	F5	FALSE	OE-2	MAPK6	UNKNOWN	SYBR	None	19.4418	19.727	0.260176	5.69805
66	F6	FALSE	OE-3	MAPK6	UNKNOWN	SYBR	None	20.1224	20.4137	0.287442	5.63449
67	F7	FALSE	SH1-1	MAPK6	UNKNOWN	SYBR	None	22.0301	22.0265	0.159018	6.82934
68	F8	FALSE	SH1-2	MAPK6	UNKNOWN	SYBR	None	22.1989	22.0184	0.265568	6.68224
69	F9	FALSE	SH1-3	MAPK6	UNKNOWN	SYBR	None	21.4309	21.6698	0.233547	6.94691
70	F10	FALSE	SH2-1	MAPK6	UNKNOWN	SYBR	None	22.5002	22.2529	0.285649	6.7063
71	F11	FALSE	SH2-2	MAPK6	UNKNOWN	SYBR	None	22.2681	22.3059	0.082208	6.96107
72	F12	FALSE	SH2-3	MAPK6	UNKNOWN	SYBR	None	22.1244	21.8174	0.301439	7.00149
