# Supplementary material for: HNF4G increases cisplatin resistance in lung adenocarcinoma via the MAPK6/Akt pathway
Source: PeerJ. 2023 Mar 10;11:e14996. doi: 10.7717/peerj.14996 (PMC10010171; doi:10.7717/peerj.14996)
Supplement: Figure S4 [file peerj-11-14996-s007.xlsx]

## Sheet: A549
Well	Well Position	Omit	Sample Name	Target Name	Task	Reporter	Quencher	CT	Ct Mean	Ct SD	Delta Ct Mean
1	A1	FALSE	Input-1	MAPK6-1	UNKNOWN	SYBR	None	25.0405	25.0967	0.169515
2	A2	FALSE	Input-1	MAPK6-1	UNKNOWN	SYBR	None	24.9625	25.0967	0.169515
3	A3	FALSE	Input-1	MAPK6-1	UNKNOWN	SYBR	None	25.2872	25.0967	0.169515
4	A4	FALSE	IgG-1	MAPK6-1	UNKNOWN	SYBR	None	34.2091	33.6746	0.684054
5	A5	FALSE	IgG-1	MAPK6-1	UNKNOWN	SYBR	None	33.911	33.6746	0.684054
6	A6	FALSE	IgG-1	MAPK6-1	UNKNOWN	SYBR	None	32.9037	33.6746	0.684054
7	A7	FALSE	HNF4G-1	MAPK6-1	UNKNOWN	SYBR	None	23.8709	24.2936	0.375346
8	A8	FALSE	HNF4G-1	MAPK6-1	UNKNOWN	SYBR	None	24.5879	24.2936	0.375346
9	A9	FALSE	HNF4G-1	MAPK6-1	UNKNOWN	SYBR	None	24.4219	24.2936	0.375346
10	A10	FALSE	Input-3	MAPK6-3	UNKNOWN	SYBR	None	22.5661	22.6455	0.30812
11	A11	FALSE	Input-3	MAPK6-3	UNKNOWN	SYBR	None	22.3848	22.6455	0.30812
12	A12	FALSE	Input-3	MAPK6-3	UNKNOWN	SYBR	None	22.9855	22.6455	0.30812
13	B1	FALSE	Input-2	MAPK6-1	UNKNOWN	SYBR	None	25.4198	25.3439	0.371344
14	B2	FALSE	Input-2	MAPK6-1	UNKNOWN	SYBR	None	25.6715	25.3439	0.371344
15	B3	FALSE	Input-2	MAPK6-1	UNKNOWN	SYBR	None	24.9405	25.3439	0.371344
16	B4	FALSE	IgG-2	MAPK6-1	UNKNOWN	SYBR	None	34.2052	33.9269	1.34109
17	B5	FALSE	IgG-2	MAPK6-1	UNKNOWN	SYBR	None	35.107	33.9269	1.34109
18	B6	FALSE	IgG-2	MAPK6-1	UNKNOWN	SYBR	None	32.4685	33.9269	1.34109
19	B7	FALSE	HNF4G-2	MAPK6-1	UNKNOWN	SYBR	None	25.1252	24.9332	0.440332
20	B8	FALSE	HNF4G-2	MAPK6-1	UNKNOWN	SYBR	None	24.4295	24.9332	0.440332
21	B9	FALSE	HNF4G-2	MAPK6-1	UNKNOWN	SYBR	None	25.2449	24.9332	0.440332
22	B10	FALSE	IgG-3	MAPK6-3	UNKNOWN	SYBR	None	32.6144	31.9629	0.764749
23	B11	FALSE	IgG-3	MAPK6-3	UNKNOWN	SYBR	None	31.1209	31.9629	0.764749
24	B12	FALSE	IgG-3	MAPK6-3	UNKNOWN	SYBR	None	32.1534	31.9629	0.764749
25	C1	FALSE	Input-3	MAPK6-1	UNKNOWN	SYBR	None	25.6438	25.8151	0.174178
26	C2	FALSE	Input-3	MAPK6-1	UNKNOWN	SYBR	None	25.8093	25.8151	0.174178
27	C3	FALSE	Input-3	MAPK6-1	UNKNOWN	SYBR	None	25.9921	25.8151	0.174178
28	C4	FALSE	IgG-3	MAPK6-1	UNKNOWN	SYBR	None	33.8841	33.3508	0.496718
29	C5	FALSE	IgG-3	MAPK6-1	UNKNOWN	SYBR	None	32.9012	33.3508	0.496718
30	C6	FALSE	IgG-3	MAPK6-1	UNKNOWN	SYBR	None	33.2672	33.3508	0.496718
31	C7	FALSE	HNF4G-3	MAPK6-1	UNKNOWN	SYBR	None	25.2461	25.5214	0.27676
32	C8	FALSE	HNF4G-3	MAPK6-1	UNKNOWN	SYBR	None	25.7996	25.5214	0.27676
33	C9	FALSE	HNF4G-3	MAPK6-1	UNKNOWN	SYBR	None	25.5185	25.5214	0.27676
34	C10	FALSE	HNF4G-3	MAPK6-3	UNKNOWN	SYBR	None	21.7298	21.8635	0.323684
35	C11	FALSE	HNF4G-3	MAPK6-3	UNKNOWN	SYBR	None	21.628	21.8635	0.323684
36	C12	FALSE	HNF4G-3	MAPK6-3	UNKNOWN	SYBR	None	22.2326	21.8635	0.323684
37	D1	FALSE	Input-1	MAPK6-2	UNKNOWN	SYBR	None	24.8707	24.8399	0.119856
38	D2	FALSE	Input-1	MAPK6-2	UNKNOWN	SYBR	None	24.9413	24.8399	0.119856
39	D3	FALSE	Input-1	MAPK6-2	UNKNOWN	SYBR	None	24.7076	24.8399	0.119856
40	D4	FALSE	IgG-1	MAPK6-2	UNKNOWN	SYBR	None	28.2027	28.5572	0.441627
41	D5	FALSE	IgG-1	MAPK6-2	UNKNOWN	SYBR	None	29.0519	28.5572	0.441627
42	D6	FALSE	IgG-1	MAPK6-2	UNKNOWN	SYBR	None	28.417	28.5572	0.441627
43	D7	FALSE	HNF4G-1	MAPK6-2	UNKNOWN	SYBR	None	23.1345	22.7416	0.361218
44	D8	FALSE	HNF4G-1	MAPK6-2	UNKNOWN	SYBR	None	22.4238	22.7416	0.361218
45	D9	FALSE	HNF4G-1	MAPK6-2	UNKNOWN	SYBR	None	22.6665	22.7416	0.361218
49	E1	FALSE	Input-2	MAPK6-2	UNKNOWN	SYBR	None	24.9527	24.5085	0.428067
50	E2	FALSE	Input-2	MAPK6-2	UNKNOWN	SYBR	None	24.4743	24.5085	0.428067
51	E3	FALSE	Input-2	MAPK6-2	UNKNOWN	SYBR	None	24.0986	24.5085	0.428067
52	E4	FALSE	IgG-2	MAPK6-2	UNKNOWN	SYBR	None	29.5891	29.8682	0.884113
53	E5	FALSE	IgG-2	MAPK6-2	UNKNOWN	SYBR	None	30.8582	29.8682	0.884113
54	E6	FALSE	IgG-2	MAPK6-2	UNKNOWN	SYBR	None	29.1573	29.8682	0.884113
55	E7	FALSE	HNF4G-2	MAPK6-2	UNKNOWN	SYBR	None	22.1983	22.4315	0.229594
56	E8	FALSE	HNF4G-2	MAPK6-2	UNKNOWN	SYBR	None	22.6573	22.4315	0.229594
57	E9	FALSE	HNF4G-2	MAPK6-2	UNKNOWN	SYBR	None	22.4389	22.4315	0.229594
61	F1	FALSE	Input-3	MAPK6-2	UNKNOWN	SYBR	None	24.1836	23.9724	0.202861
62	F2	FALSE	Input-3	MAPK6-2	UNKNOWN	SYBR	None	23.7791	23.9724	0.202861
63	F3	FALSE	Input-3	MAPK6-2	UNKNOWN	SYBR	None	23.9545	23.9724	0.202861
64	F4	FALSE	IgG-3	MAPK6-2	UNKNOWN	SYBR	None	29.9382	30.4509	1.06015
65	F5	FALSE	IgG-3	MAPK6-2	UNKNOWN	SYBR	None	29.7446	30.4509	1.06015
66	F6	FALSE	IgG-3	MAPK6-2	UNKNOWN	SYBR	None	31.67	30.4509	1.06015
67	F7	FALSE	HNF4G-3	MAPK6-2	UNKNOWN	SYBR	None	22.4634	22.3916	0.06426
68	F8	FALSE	HNF4G-3	MAPK6-2	UNKNOWN	SYBR	None	22.3722	22.3916	0.06426
69	F9	FALSE	HNF4G-3	MAPK6-2	UNKNOWN	SYBR	None	22.3393	22.3916	0.06426
73	G1	FALSE	Input-1	MAPK6-3	UNKNOWN	SYBR	None	23.0721	23.4717	0.498274
74	G2	FALSE	Input-1	MAPK6-3	UNKNOWN	SYBR	None	23.313	23.4717	0.498274
75	G3	FALSE	Input-1	MAPK6-3	UNKNOWN	SYBR	None	24.0299	23.4717	0.498274
76	G4	FALSE	IgG-1	MAPK6-3	UNKNOWN	SYBR	None	31.7545	32.0296	0.347813
77	G5	FALSE	IgG-1	MAPK6-3	UNKNOWN	SYBR	None	32.4206	32.0296	0.347813
78	G6	FALSE	IgG-1	MAPK6-3	UNKNOWN	SYBR	None	31.9137	32.0296	0.347813
79	G7	FALSE	HNF4G-1	MAPK6-3	UNKNOWN	SYBR	None	22.7958	22.6931	0.228308
80	G8	FALSE	HNF4G-1	MAPK6-3	UNKNOWN	SYBR	None	22.8521	22.6931	0.228308
81	G9	FALSE	HNF4G-1	MAPK6-3	UNKNOWN	SYBR	None	22.4315	22.6931	0.228308
85	H1	FALSE	Input-2	MAPK6-3	UNKNOWN	SYBR	None	23.4301	23.344	0.374841
86	H2	FALSE	Input-2	MAPK6-3	UNKNOWN	SYBR	None	23.6683	23.344	0.374841
87	H3	FALSE	Input-2	MAPK6-3	UNKNOWN	SYBR	None	22.9336	23.344	0.374841
88	H4	FALSE	IgG-2	MAPK6-3	UNKNOWN	SYBR	None	33.0566	34.7791	1.49911
89	H5	FALSE	IgG-2	MAPK6-3	UNKNOWN	SYBR	None	35.4916	34.7791	1.49911
90	H6	FALSE	IgG-2	MAPK6-3	UNKNOWN	SYBR	None	35.789	34.7791	1.49911
91	H7	FALSE	HNF4G-2	MAPK6-3	UNKNOWN	SYBR	None	22.7127	22.8688	0.187194
92	H8	FALSE	HNF4G-2	MAPK6-3	UNKNOWN	SYBR	None	23.0763	22.8688	0.187194
93	H9	FALSE	HNF4G-2	MAPK6-3	UNKNOWN	SYBR	None	22.8174	22.8688	0.187194

## Sheet: HCC827
Well	Well Position	Omit	Sample Name	Target Name	Task	Reporter	Quencher	CT	Ct Mean	Ct SD	Delta Ct Mean
1	A1	FALSE	Input-1	MAPK6-1	UNKNOWN	SYBR	None	24.923	24.9707	0.196842
2	A2	FALSE	Input-1	MAPK6-1	UNKNOWN	SYBR	None	25.187	24.9707	0.196842
3	A3	FALSE	Input-1	MAPK6-1	UNKNOWN	SYBR	None	24.8021	24.9707	0.196842
4	A4	FALSE	IgG-1	MAPK6-1	UNKNOWN	SYBR	None	29.209	29.1296	0.289284
5	A5	FALSE	IgG-1	MAPK6-1	UNKNOWN	SYBR	None	29.371	29.1296	0.289284
6	A6	FALSE	IgG-1	MAPK6-1	UNKNOWN	SYBR	None	28.809	29.1296	0.289284
7	A7	FALSE	HNF4G-1	MAPK6-1	UNKNOWN	SYBR	None	23.8977	23.8733	0.283095
8	A8	FALSE	HNF4G-1	MAPK6-1	UNKNOWN	SYBR	None	24.1435	23.8733	0.283095
9	A9	FALSE	HNF4G-1	MAPK6-1	UNKNOWN	SYBR	None	23.5789	23.8733	0.283095
10	A10	FALSE	Input-3	MAPK6-3	UNKNOWN	SYBR	None	21.6037	21.8474	0.329084
11	A11	FALSE	Input-3	MAPK6-3	UNKNOWN	SYBR	None	21.7167	21.8474	0.329084
12	A12	FALSE	Input-3	MAPK6-3	UNKNOWN	SYBR	None	22.2218	21.8474	0.329084
13	B1	FALSE	Input-2	MAPK6-1	UNKNOWN	SYBR	None	24.0147	24.1714	0.472852
14	B2	FALSE	Input-2	MAPK6-1	UNKNOWN	SYBR	None	23.7967	24.1714	0.472852
15	B3	FALSE	Input-2	MAPK6-1	UNKNOWN	SYBR	None	24.7027	24.1714	0.472852
16	B4	FALSE	IgG-2	MAPK6-1	UNKNOWN	SYBR	None	29.767	29.8837	0.560355
17	B5	FALSE	IgG-2	MAPK6-1	UNKNOWN	SYBR	None	30.4932	29.8837	0.560355
18	B6	FALSE	IgG-2	MAPK6-1	UNKNOWN	SYBR	None	29.3909	29.8837	0.560355
19	B7	FALSE	HNF4G-2	MAPK6-1	UNKNOWN	SYBR	None	24.5148	24.3887	0.434354
20	B8	FALSE	HNF4G-2	MAPK6-1	UNKNOWN	SYBR	None	24.7461	24.3887	0.434354
21	B9	FALSE	HNF4G-2	MAPK6-1	UNKNOWN	SYBR	None	23.9053	24.3887	0.434354
22	B10	FALSE	IgG-3	MAPK6-3	UNKNOWN	SYBR	None	28.3147	28.367	0.559675
23	B11	FALSE	IgG-3	MAPK6-3	UNKNOWN	SYBR	None	27.8353	28.367	0.559675
24	B12	FALSE	IgG-3	MAPK6-3	UNKNOWN	SYBR	None	28.951	28.367	0.559675
25	C1	FALSE	Input-3	MAPK6-1	UNKNOWN	SYBR	None	24.8601	24.619	0.256045
26	C2	FALSE	Input-3	MAPK6-1	UNKNOWN	SYBR	None	24.3502	24.619	0.256045
27	C3	FALSE	Input-3	MAPK6-1	UNKNOWN	SYBR	None	24.6468	24.619	0.256045
28	C4	FALSE	IgG-3	MAPK6-1	UNKNOWN	SYBR	None	29.7412	29.6913	0.370513
29	C5	FALSE	IgG-3	MAPK6-1	UNKNOWN	SYBR	None	30.0344	29.6913	0.370513
30	C6	FALSE	IgG-3	MAPK6-1	UNKNOWN	SYBR	None	29.2984	29.6913	0.370513
31	C7	FALSE	HNF4G-3	MAPK6-1	UNKNOWN	SYBR	None	24.6529	24.1025	0.476976
32	C8	FALSE	HNF4G-3	MAPK6-1	UNKNOWN	SYBR	None	23.8457	24.1025	0.476976
33	C9	FALSE	HNF4G-3	MAPK6-1	UNKNOWN	SYBR	None	23.809	24.1025	0.476976
34	C10	FALSE	HNF4G-3	MAPK6-3	UNKNOWN	SYBR	None	21.897	21.8647	0.0771707
35	C11	FALSE	HNF4G-3	MAPK6-3	UNKNOWN	SYBR	None	21.7766	21.8647	0.0771707
36	C12	FALSE	HNF4G-3	MAPK6-3	UNKNOWN	SYBR	None	21.9204	21.8647	0.0771707
37	D1	FALSE	Input-1	MAPK6-2	UNKNOWN	SYBR	None	24.6006	24.5261	0.0993126
38	D2	FALSE	Input-1	MAPK6-2	UNKNOWN	SYBR	None	24.5643	24.5261	0.0993126
39	D3	FALSE	Input-1	MAPK6-2	UNKNOWN	SYBR	None	24.4133	24.5261	0.0993126
40	D4	FALSE	IgG-1	MAPK6-2	UNKNOWN	SYBR	None	26.3513	27.0818	0.682117
41	D5	FALSE	IgG-1	MAPK6-2	UNKNOWN	SYBR	None	27.7021	27.0818	0.682117
42	D6	FALSE	IgG-1	MAPK6-2	UNKNOWN	SYBR	None	27.1921	27.0818	0.682117
43	D7	FALSE	HNF4G-1	MAPK6-2	UNKNOWN	SYBR	None	22.529	22.0641	0.471974
44	D8	FALSE	HNF4G-1	MAPK6-2	UNKNOWN	SYBR	None	21.5854	22.0641	0.471974
45	D9	FALSE	HNF4G-1	MAPK6-2	UNKNOWN	SYBR	None	22.0778	22.0641	0.471974
49	E1	FALSE	Input-2	MAPK6-2	UNKNOWN	SYBR	None	24.0708	24.2856	0.191815
50	E2	FALSE	Input-2	MAPK6-2	UNKNOWN	SYBR	None	24.4398	24.2856	0.191815
51	E3	FALSE	Input-2	MAPK6-2	UNKNOWN	SYBR	None	24.3462	24.2856	0.191815
52	E4	FALSE	IgG-2	MAPK6-2	UNKNOWN	SYBR	None	29.2674	29.8775	0.85437
53	E5	FALSE	IgG-2	MAPK6-2	UNKNOWN	SYBR	None	30.854	29.8775	0.85437
54	E6	FALSE	IgG-2	MAPK6-2	UNKNOWN	SYBR	None	29.5113	29.8775	0.85437
55	E7	FALSE	HNF4G-2	MAPK6-2	UNKNOWN	SYBR	None	22.1862	22.6574	0.445876
56	E8	FALSE	HNF4G-2	MAPK6-2	UNKNOWN	SYBR	None	22.7135	22.6574	0.445876
57	E9	FALSE	HNF4G-2	MAPK6-2	UNKNOWN	SYBR	None	23.0726	22.6574	0.445876
61	F1	FALSE	Input-3	MAPK6-2	UNKNOWN	SYBR	None	23.9107	23.4316	0.427794
62	F2	FALSE	Input-3	MAPK6-2	UNKNOWN	SYBR	None	23.0879	23.4316	0.427794
63	F3	FALSE	Input-3	MAPK6-2	UNKNOWN	SYBR	None	23.2961	23.4316	0.427794
64	F4	FALSE	IgG-3	MAPK6-2	UNKNOWN	SYBR	None	30.2684	31.0598	0.772361
65	F5	FALSE	IgG-3	MAPK6-2	UNKNOWN	SYBR	None	31.0993	31.0598	0.772361
66	F6	FALSE	IgG-3	MAPK6-2	UNKNOWN	SYBR	None	31.8116	31.0598	0.772361
67	F7	FALSE	HNF4G-3	MAPK6-2	UNKNOWN	SYBR	None	22.3555	22.8267	0.590383
68	F8	FALSE	HNF4G-3	MAPK6-2	UNKNOWN	SYBR	None	23.4889	22.8267	0.590383
69	F9	FALSE	HNF4G-3	MAPK6-2	UNKNOWN	SYBR	None	22.6356	22.8267	0.590383
73	G1	FALSE	Input-1	MAPK6-3	UNKNOWN	SYBR	None	23.6188	23.7631	0.412956
74	G2	FALSE	Input-1	MAPK6-3	UNKNOWN	SYBR	None	24.2289	23.7631	0.412956
75	G3	FALSE	Input-1	MAPK6-3	UNKNOWN	SYBR	None	23.4417	23.7631	0.412956
76	G4	FALSE	IgG-1	MAPK6-3	UNKNOWN	SYBR	None	29.0412	28.8732	0.276297
77	G5	FALSE	IgG-1	MAPK6-3	UNKNOWN	SYBR	None	28.5543	28.8732	0.276297
78	G6	FALSE	IgG-1	MAPK6-3	UNKNOWN	SYBR	None	29.0241	28.8732	0.276297
79	G7	FALSE	HNF4G-1	MAPK6-3	UNKNOWN	SYBR	None	21.6527	21.4977	0.262943
80	G8	FALSE	HNF4G-1	MAPK6-3	UNKNOWN	SYBR	None	21.1941	21.4977	0.262943
81	G9	FALSE	HNF4G-1	MAPK6-3	UNKNOWN	SYBR	None	21.6463	21.4977	0.262943
85	H1	FALSE	Input-2	MAPK6-3	UNKNOWN	SYBR	None	21.4092	21.4326	0.332709
86	H2	FALSE	Input-2	MAPK6-3	UNKNOWN	SYBR	None	21.7764	21.4326	0.332709
87	H3	FALSE	Input-2	MAPK6-3	UNKNOWN	SYBR	None	21.1122	21.4326	0.332709
88	H4	FALSE	IgG-2	MAPK6-3	UNKNOWN	SYBR	None	30.6316	30.3721	0.633342
89	H5	FALSE	IgG-2	MAPK6-3	UNKNOWN	SYBR	None	30.8346	30.3721	0.633342
90	H6	FALSE	IgG-2	MAPK6-3	UNKNOWN	SYBR	None	29.6503	30.3721	0.633342
91	H7	FALSE	HNF4G-2	MAPK6-3	UNKNOWN	SYBR	None	22.3697	22.5898	0.61243
92	H8	FALSE	HNF4G-2	MAPK6-3	UNKNOWN	SYBR	None	22.1178	22.5898	0.61243
93	H9	FALSE	HNF4G-2	MAPK6-3	UNKNOWN	SYBR	None	23.2819	22.5898	0.61243
