# Supplementary material for: HNF4G increases cisplatin resistance in lung adenocarcinoma via the MAPK6/Akt pathway
Source: PeerJ. 2023 Mar 10;11:e14996. doi: 10.7717/peerj.14996 (PMC10010171; doi:10.7717/peerj.14996)
Supplement: Supplemental Information 3 [file peerj-11-14996-s003.xlsx]

## Sheet: A549
Well	Well Position	Omit	Sample Name	Target Name	Task	Reporter	Quencher	CT	Ct Mean	Ct SD	Delta Ct Mean
1	A1	FALSE	NC-1	ACTB	UNKNOWN	SYBR	None	15.7251	15.461	0.241883
2	A2	FALSE	NC-2	ACTB	UNKNOWN	SYBR	None	16.4421	16.2938	0.18243
3	A3	FALSE	NC-3	ACTB	UNKNOWN	SYBR	None	13.6711	13.8117	0.148325
4	A4	FALSE	OE-1	ACTB	UNKNOWN	SYBR	None	15.1083	15.4639	0.354074
5	A5	FALSE	OE-2	ACTB	UNKNOWN	SYBR	None	13.742	13.9257	0.172568
6	A6	FALSE	OE-3	ACTB	UNKNOWN	SYBR	None	15.161	15.0924	0.281048
7	A7	FALSE	SH1-1	ACTB	UNKNOWN	SYBR	None	14.4258	14.6693	0.214826
8	A8	FALSE	SH1-2	ACTB	UNKNOWN	SYBR	None	14.739	15.0289	0.251981
9	A9	FALSE	SH1-3	ACTB	UNKNOWN	SYBR	None	13.3405	13.4331	0.414327
10	A10	FALSE	SH2-1	ACTB	UNKNOWN	SYBR	None	16.1687	15.8964	0.291108
11	A11	FALSE	SH2-2	ACTB	UNKNOWN	SYBR	None	14.9168	15.0094	0.0808981
12	A12	FALSE	SH2-3	ACTB	UNKNOWN	SYBR	None	14.0649	14.4773	0.431377
13	B1	FALSE	NC-1	ACTB	UNKNOWN	SYBR	None	15.4079	15.461	0.241883
14	B2	FALSE	NC-2	ACTB	UNKNOWN	SYBR	None	16.3492	16.2938	0.18243
15	B3	FALSE	NC-3	ACTB	UNKNOWN	SYBR	None	13.7974	13.8117	0.148325
16	B4	FALSE	OE-1	ACTB	UNKNOWN	SYBR	None	15.4671	15.4639	0.354074
17	B5	FALSE	OE-2	ACTB	UNKNOWN	SYBR	None	14.0844	13.9257	0.172568
18	B6	FALSE	OE-3	ACTB	UNKNOWN	SYBR	None	14.7834	15.0924	0.281048
19	B7	FALSE	SH1-1	ACTB	UNKNOWN	SYBR	None	14.7499	14.6693	0.214826
20	B8	FALSE	SH1-2	ACTB	UNKNOWN	SYBR	None	15.195	15.0289	0.251981
21	B9	FALSE	SH1-3	ACTB	UNKNOWN	SYBR	None	13.0729	13.4331	0.414327
22	B10	FALSE	SH2-1	ACTB	UNKNOWN	SYBR	None	15.5895	15.8964	0.291108
23	B11	FALSE	SH2-2	ACTB	UNKNOWN	SYBR	None	15.0453	15.0094	0.0808981
24	B12	FALSE	SH2-3	ACTB	UNKNOWN	SYBR	None	14.4415	14.4773	0.431377
25	C1	FALSE	NC-1	ACTB	UNKNOWN	SYBR	None	15.2501	15.461	0.241883
26	C2	FALSE	NC-2	ACTB	UNKNOWN	SYBR	None	16.0901	16.2938	0.18243
27	C3	FALSE	NC-3	ACTB	UNKNOWN	SYBR	None	13.9667	13.8117	0.148325
28	C4	FALSE	OE-1	ACTB	UNKNOWN	SYBR	None	15.8164	15.4639	0.354074
29	C5	FALSE	OE-2	ACTB	UNKNOWN	SYBR	None	13.9507	13.9257	0.172568
30	C6	FALSE	OE-3	ACTB	UNKNOWN	SYBR	None	15.3328	15.0924	0.281048
31	C7	FALSE	SH1-1	ACTB	UNKNOWN	SYBR	None	14.8321	14.6693	0.214826
32	C8	FALSE	SH1-2	ACTB	UNKNOWN	SYBR	None	15.1529	15.0289	0.251981
33	C9	FALSE	SH1-3	ACTB	UNKNOWN	SYBR	None	13.8859	13.4331	0.414327
34	C10	FALSE	SH2-1	ACTB	UNKNOWN	SYBR	None	15.9311	15.8964	0.291108
35	C11	FALSE	SH2-2	ACTB	UNKNOWN	SYBR	None	15.0662	15.0094	0.0808981
36	C12	FALSE	SH2-3	ACTB	UNKNOWN	SYBR	None	14.9254	14.4773	0.431377
37	D1	FALSE	NC-1	HNF4G	UNKNOWN	SYBR	None	20.3005	20.3686	0.0739241	4.90754
38	D2	FALSE	NC-2	HNF4G	UNKNOWN	SYBR	None	21.8093	21.4982	0.283165	5.20443
39	D3	FALSE	NC-3	HNF4G	UNKNOWN	SYBR	None	19.0231	19.0934	0.524363	5.28164
40	D4	FALSE	OE-1	HNF4G	UNKNOWN	SYBR	None	18.3131	18.2019	0.129148	2.73799
41	D5	FALSE	OE-2	HNF4G	UNKNOWN	SYBR	None	17.1817	17.0135	0.162933	3.08778
42	D6	FALSE	OE-3	HNF4G	UNKNOWN	SYBR	None	17.9682	18.1357	0.199802	3.04329
43	D7	FALSE	SH1-1	HNF4G	UNKNOWN	SYBR	None	21.225	21.4282	0.225549	6.75891
44	D8	FALSE	SH1-2	HNF4G	UNKNOWN	SYBR	None	21.6181	21.9124	0.270189	6.8835
45	D9	FALSE	SH1-3	HNF4G	UNKNOWN	SYBR	None	19.8436	20.0132	0.332137	6.58005
46	D10	FALSE	SH2-1	HNF4G	UNKNOWN	SYBR	None	23.0886	23.0312	0.270624	7.13478
47	D11	FALSE	SH2-2	HNF4G	UNKNOWN	SYBR	None	22.6586	22.2552	0.35528	7.24577
48	D12	FALSE	SH2-3	HNF4G	UNKNOWN	SYBR	None	21.4224	21.5528	0.202424	7.07553
49	E1	FALSE	NC-1	HNF4G	UNKNOWN	SYBR	None	20.4472	20.3686	0.0739241	4.90754
50	E2	FALSE	NC-2	HNF4G	UNKNOWN	SYBR	None	21.2555	21.4982	0.283165	5.20443
51	E3	FALSE	NC-3	HNF4G	UNKNOWN	SYBR	None	19.6493	19.0934	0.524363	5.28164
52	E4	FALSE	OE-1	HNF4G	UNKNOWN	SYBR	None	18.2324	18.2019	0.129148	2.73799
53	E5	FALSE	OE-2	HNF4G	UNKNOWN	SYBR	None	17.0022	17.0135	0.162933	3.08778
54	E6	FALSE	OE-3	HNF4G	UNKNOWN	SYBR	None	18.3569	18.1357	0.199802	3.04329
55	E7	FALSE	SH1-1	HNF4G	UNKNOWN	SYBR	None	21.3886	21.4282	0.225549	6.75891
56	E8	FALSE	SH1-2	HNF4G	UNKNOWN	SYBR	None	21.9701	21.9124	0.270189	6.8835
57	E9	FALSE	SH1-3	HNF4G	UNKNOWN	SYBR	None	19.8001	20.0132	0.332137	6.58005
58	E10	FALSE	SH2-1	HNF4G	UNKNOWN	SYBR	None	23.2685	23.0312	0.270624	7.13478
59	E11	FALSE	SH2-2	HNF4G	UNKNOWN	SYBR	None	22.118	22.2552	0.35528	7.24577
60	E12	FALSE	SH2-3	HNF4G	UNKNOWN	SYBR	None	21.45	21.5528	0.202424	7.07553
61	F1	FALSE	NC-1	HNF4G	UNKNOWN	SYBR	None	20.3579	20.3686	0.0739241	4.90754
62	F2	FALSE	NC-2	HNF4G	UNKNOWN	SYBR	None	21.4299	21.4982	0.283165	5.20443
63	F3	FALSE	NC-3	HNF4G	UNKNOWN	SYBR	None	18.6077	19.0934	0.524363	5.28164
64	F4	FALSE	OE-1	HNF4G	UNKNOWN	SYBR	None	18.0603	18.2019	0.129148	2.73799
65	F5	FALSE	OE-2	HNF4G	UNKNOWN	SYBR	None	16.8565	17.0135	0.162933	3.08778
66	F6	FALSE	OE-3	HNF4G	UNKNOWN	SYBR	None	18.082	18.1357	0.199802	3.04329
67	F7	FALSE	SH1-1	HNF4G	UNKNOWN	SYBR	None	21.6709	21.4282	0.225549	6.75891
68	F8	FALSE	SH1-2	HNF4G	UNKNOWN	SYBR	None	22.1491	21.9124	0.270189	6.8835
69	F9	FALSE	SH1-3	HNF4G	UNKNOWN	SYBR	None	20.3959	20.0132	0.332137	6.58005
70	F10	FALSE	SH2-1	HNF4G	UNKNOWN	SYBR	None	22.7365	23.0312	0.270624	7.13478
71	F11	FALSE	SH2-2	HNF4G	UNKNOWN	SYBR	None	21.9889	22.2552	0.35528	7.24577
72	F12	FALSE	SH2-3	HNF4G	UNKNOWN	SYBR	None	21.786	21.5528	0.202424	7.07553

## Sheet: HCC827
Well	Well Position	Omit	Sample Name	Target Name	Task	Reporter	Quencher	CT	Ct Mean	Ct SD	Delta Ct Mean
1	A1	FALSE	NC-1	ACTB	UNKNOWN	SYBR	None	14.2029	14.3705	0.149235
2	A2	FALSE	NC-2	ACTB	UNKNOWN	SYBR	None	14.7794	15.0696	0.258314
3	A3	FALSE	NC-3	ACTB	UNKNOWN	SYBR	None	13.7908	14.544	0.652331
4	A4	FALSE	OE-1	ACTB	UNKNOWN	SYBR	None	15.6344	15.2781	0.358827
5	A5	FALSE	OE-2	ACTB	UNKNOWN	SYBR	None	13.5598	13.5533	0.0435899
6	A6	FALSE	OE-3	ACTB	UNKNOWN	SYBR	None	14.04	13.9722	0.235496
7	A7	FALSE	SH1-1	ACTB	UNKNOWN	SYBR	None	14.711	14.9378	0.19676
8	A8	FALSE	SH1-2	ACTB	UNKNOWN	SYBR	None	15.3871	15.1994	0.165373
9	A9	FALSE	SH1-3	ACTB	UNKNOWN	SYBR	None	14.6807	14.3186	0.323963
10	A10	FALSE	SH2-1	ACTB	UNKNOWN	SYBR	None	15.8726	15.9392	0.326092
11	A11	FALSE	SH2-2	ACTB	UNKNOWN	SYBR	None	14.8618	14.6082	0.50204
12	A12	FALSE	SH2-3	ACTB	UNKNOWN	SYBR	None	14.4727	13.9377	0.495425
13	B1	FALSE	NC-1	ACTB	UNKNOWN	SYBR	None	14.489	14.3705	0.149235
14	B2	FALSE	NC-2	ACTB	UNKNOWN	SYBR	None	15.155	15.0696	0.258314
15	B3	FALSE	NC-3	ACTB	UNKNOWN	SYBR	None	14.9303	14.544	0.652331
16	B4	FALSE	OE-1	ACTB	UNKNOWN	SYBR	None	14.9168	15.2781	0.358827
17	B5	FALSE	OE-2	ACTB	UNKNOWN	SYBR	None	13.5933	13.5533	0.0435899
18	B6	FALSE	OE-3	ACTB	UNKNOWN	SYBR	None	13.7102	13.9722	0.235496
19	B7	FALSE	SH1-1	ACTB	UNKNOWN	SYBR	None	15.0388	14.9378	0.19676
20	B8	FALSE	SH1-2	ACTB	UNKNOWN	SYBR	None	15.1358	15.1994	0.165373
21	B9	FALSE	SH1-3	ACTB	UNKNOWN	SYBR	None	14.0561	14.3186	0.323963
22	B10	FALSE	SH2-1	ACTB	UNKNOWN	SYBR	None	15.6515	15.9392	0.326092
23	B11	FALSE	SH2-2	ACTB	UNKNOWN	SYBR	None	14.0299	14.6082	0.50204
24	B12	FALSE	SH2-3	ACTB	UNKNOWN	SYBR	None	13.8456	13.9377	0.495425
25	C1	FALSE	NC-1	ACTB	UNKNOWN	SYBR	None	14.4196	14.3705	0.149235
26	C2	FALSE	NC-2	ACTB	UNKNOWN	SYBR	None	15.2744	15.0696	0.258314
27	C3	FALSE	NC-3	ACTB	UNKNOWN	SYBR	None	14.9109	14.544	0.652331
28	C4	FALSE	OE-1	ACTB	UNKNOWN	SYBR	None	15.2831	15.2781	0.358827
29	C5	FALSE	OE-2	ACTB	UNKNOWN	SYBR	None	13.5068	13.5533	0.0435899
30	C6	FALSE	OE-3	ACTB	UNKNOWN	SYBR	None	14.1663	13.9722	0.235496
31	C7	FALSE	SH1-1	ACTB	UNKNOWN	SYBR	None	15.0635	14.9378	0.19676
32	C8	FALSE	SH1-2	ACTB	UNKNOWN	SYBR	None	15.0753	15.1994	0.165373
33	C9	FALSE	SH1-3	ACTB	UNKNOWN	SYBR	None	14.2191	14.3186	0.323963
34	C10	FALSE	SH2-1	ACTB	UNKNOWN	SYBR	None	16.2934	15.9392	0.326092
35	C11	FALSE	SH2-2	ACTB	UNKNOWN	SYBR	None	14.9328	14.6082	0.50204
36	C12	FALSE	SH2-3	ACTB	UNKNOWN	SYBR	None	13.4947	13.9377	0.495425
37	D1	FALSE	NC-1	HNF4G	UNKNOWN	SYBR	None	20.5217	20.4333	0.201838	6.06279
38	D2	FALSE	NC-2	HNF4G	UNKNOWN	SYBR	None	20.7441	21.3535	0.651715	6.28389
39	D3	FALSE	NC-3	HNF4G	UNKNOWN	SYBR	None	20.9395	20.8183	0.264096	6.27432
40	D4	FALSE	OE-1	HNF4G	UNKNOWN	SYBR	None	19.7507	19.5387	0.183647	4.26059
41	D5	FALSE	OE-2	HNF4G	UNKNOWN	SYBR	None	17.9155	17.7348	0.333748	4.18144
42	D6	FALSE	OE-3	HNF4G	UNKNOWN	SYBR	None	18.8061	18.3853	0.442203	4.41308
43	D7	FALSE	SH1-1	HNF4G	UNKNOWN	SYBR	None	22.6444	22.637	0.00684252	7.69925
44	D8	FALSE	SH1-2	HNF4G	UNKNOWN	SYBR	None	22.3204	22.7839	0.447126	7.58449
45	D9	FALSE	SH1-3	HNF4G	UNKNOWN	SYBR	None	22.027	21.9927	0.154347	7.67412
46	D10	FALSE	SH2-1	HNF4G	UNKNOWN	SYBR	None	23.218	23.0842	0.118659	7.14509
47	D11	FALSE	SH2-2	HNF4G	UNKNOWN	SYBR	None	22.1923	22.0352	0.42459	7.42704
48	D12	FALSE	SH2-3	HNF4G	UNKNOWN	SYBR	None	21.8899	21.8493	0.32811	7.91162
49	E1	FALSE	NC-1	HNF4G	UNKNOWN	SYBR	None	20.2023	20.4333	0.201838	6.06279
50	E2	FALSE	NC-2	HNF4G	UNKNOWN	SYBR	None	22.0406	21.3535	0.651715	6.28389
51	E3	FALSE	NC-3	HNF4G	UNKNOWN	SYBR	None	20.5154	20.8183	0.264096	6.27432
52	E4	FALSE	OE-1	HNF4G	UNKNOWN	SYBR	None	19.4329	19.5387	0.183647	4.26059
53	E5	FALSE	OE-2	HNF4G	UNKNOWN	SYBR	None	17.3496	17.7348	0.333748	4.18144
54	E6	FALSE	OE-3	HNF4G	UNKNOWN	SYBR	None	18.4252	18.3853	0.442203	4.41308
55	E7	FALSE	SH1-1	HNF4G	UNKNOWN	SYBR	None	22.6357	22.637	0.00684252	7.69925
56	E8	FALSE	SH1-2	HNF4G	UNKNOWN	SYBR	None	23.2126	22.7839	0.447126	7.58449
57	E9	FALSE	SH1-3	HNF4G	UNKNOWN	SYBR	None	22.127	21.9927	0.154347	7.67412
58	E10	FALSE	SH2-1	HNF4G	UNKNOWN	SYBR	None	22.9918	23.0842	0.118659	7.14509
59	E11	FALSE	SH2-2	HNF4G	UNKNOWN	SYBR	None	21.5545	22.0352	0.42459	7.42704
60	E12	FALSE	SH2-3	HNF4G	UNKNOWN	SYBR	None	21.5028	21.8493	0.32811	7.91162
61	F1	FALSE	NC-1	HNF4G	UNKNOWN	SYBR	None	20.5758	20.4333	0.201838	6.06279
62	F2	FALSE	NC-2	HNF4G	UNKNOWN	SYBR	None	21.2757	21.3535	0.651715	6.28389
63	F3	FALSE	NC-3	HNF4G	UNKNOWN	SYBR	None	21.0001	20.8183	0.264096	6.27432
64	F4	FALSE	OE-1	HNF4G	UNKNOWN	SYBR	None	19.4324	19.5387	0.183647	4.26059
65	F5	FALSE	OE-2	HNF4G	UNKNOWN	SYBR	None	17.9392	17.7348	0.333748	4.18144
66	F6	FALSE	OE-3	HNF4G	UNKNOWN	SYBR	None	17.9244	18.3853	0.442203	4.41308
67	F7	FALSE	SH1-1	HNF4G	UNKNOWN	SYBR	None	22.6309	22.637	0.00684252	7.69925
68	F8	FALSE	SH1-2	HNF4G	UNKNOWN	SYBR	None	22.8187	22.7839	0.447126	7.58449
69	F9	FALSE	SH1-3	HNF4G	UNKNOWN	SYBR	None	21.8241	21.9927	0.154347	7.67412
70	F10	FALSE	SH2-1	HNF4G	UNKNOWN	SYBR	None	23.043	23.0842	0.118659	7.14509
71	F11	FALSE	SH2-2	HNF4G	UNKNOWN	SYBR	None	22.3589	22.0352	0.42459	7.42704
72	F12	FALSE	SH2-3	HNF4G	UNKNOWN	SYBR	None	22.1552	21.8493	0.32811	7.91162
