# Supplementary material for: HNF4G increases cisplatin resistance in lung adenocarcinoma via the MAPK6/Akt pathway
Source: PeerJ. 2023 Mar 10;11:e14996. doi: 10.7717/peerj.14996 (PMC10010171; doi:10.7717/peerj.14996)
Supplement: Supplemental Information 4 [file peerj-11-14996-s004.xlsx]

## Sheet: A549-HNF4G
HNF4G-NC	cisplatin (uM)						percentages
	0	4497.6	4804.09	4570.39	4867.17	4753.23		0.952838	1.02479	0.969925	1.0396	1.01285
	2	4491.53	4145.11	4377.1	4145.84	4247.9		0.951414	0.870088	0.924549	0.870259	0.894219
	4	3693.2	3699.94	3774.24	3510.28	3518.83		0.763995	0.765579	0.783021	0.721054	0.723061
	8	3034.71	2729.2	2909.04	2775.54	2769.49		0.609409	0.537688	0.579906	0.548566	0.547145
	16	2386.57	2541.26	2449.89	2417.53	2530.83		0.457251	0.493566	0.472117	0.464518	0.491117
	32	1715.48	1861.66	1901.66	1974.75	2105.23		0.299705	0.334023	0.343414	0.360572	0.391203
	DMEM	462.349	420.154	439.01	432.511	440.15
HNF4G-OE	cisplatin (uM)						percentages
	0	4868.46	4866.79	5001.14	4675.77	4812.21		1.00534	1.00496	1.03536	0.961732	0.992608
	2	4395.14	4559.65	4461.04	4340.12	4500.37		0.898224	0.935455	0.913139	0.885775	0.922038
	4	3943.1	4115.91	3922.99	3787.58	3756.75		0.795928	0.835035	0.791376	0.760734	0.753757
	8	3478.7	3319.5	3335.07	3364.44	3248.18		0.690835	0.654808	0.658332	0.664979	0.638668
	16	2801.44	2831.13	3134.8	2766.54	2743.05		0.537571	0.544291	0.613011	0.529673	0.524356
	32	2479.11	2188.2	2341.38	2469.31	2542.05		0.464628	0.398795	0.43346	0.462409	0.47887
	DMEM	410.337	432.442	428.839	426.729	431.462
HNF4G-SH1	cisplatin (uM)						percentages
	0	4594.6	4825.67	4624.61	4777.17	4781.27		0.970352	1.0247	0.97741	1.01329	1.01425
	2	3510.12	3601.9	3453.25	3464.5	3520.06		0.715302	0.736888	0.701929	0.704573	0.717639
	4	3114.77	2810.83	2978.19	3155.91	3103.01		0.622324	0.550843	0.590202	0.632	0.619557
	8	2665.51	2477.04	2335.82	2332.86	2733.12		0.516665	0.472341	0.439129	0.438433	0.532567
	16	1956.89	2150.15	2198.57	2230.77	2217.62		0.350011	0.395462	0.406852	0.414424	0.411331
	32	1524.94	1637.09	1753.76	1639.91	1398.49		0.248426	0.2748	0.302238	0.275464	0.218686
	DMEM	468.374	473.558	460.95	488.399	451.849
HNF4G-SH2	cisplatin (uM)
	0	4335.24	4549.76	4489.2	4370.29	4634.67		0.965095	1.01835	1.00332	0.973796	1.03943
	2	3501.13	3242.09	3248.05	3271.57	3173.12		0.758011	0.6937	0.695178	0.701019	0.676575
	4	3011.61	2987.44	2895.39	2816.94	2806.26		0.636477	0.630478	0.607624	0.588148	0.585497
	8	2518.57	2499.07	2537.18	2613	2391.66		0.514072	0.50923	0.518691	0.537516	0.482564
	16	1865.42	1936.31	2000.14	2126.95	2009.28		0.351913	0.369513	0.385361	0.416844	0.387629
	32	1767.39	1663.35	1716.23	1832.81	1574.95		0.327575	0.301746	0.314875	0.343818	0.2798
	DMEM	458.596	424.965	449.82	467.51	438.896

## Sheet: HCC827-HNF4G
HNF4G-NC	cisplatin (uM)						percentages
	0	3110.65	3120.37	3472.36	3267.64	3334.13		0.946885	0.950319	1.07464	1.00233	1.02582
	2	2422.44	2320.75	2444.79	2292.32	2475.78		0.70381	0.667892	0.711703	0.657851	0.72265
	4	1939.06	1960.4	1874.79	1985.12	1889.96		0.533076	0.540614	0.510376	0.549346	0.515734
	8	1612.83	1778.11	1662.07	1636.27	1844.68		0.417852	0.476228	0.435242	0.426132	0.499744
	16	1484.17	1491.76	1503.62	1508.22	1407.32		0.37241	0.375091	0.379279	0.380905	0.345266
	32	1467.42	1330.03	1299.86	1467.54	1267.34		0.366492	0.317968	0.307309	0.366535	0.295823
	DMEM	436.371	425.506	437.223	435.112	414.753
HNF4G-OE	cisplatin (uM)						percentages
	0	3368.45	3429.99	3293.66	3549.03	3280.35		0.994579	1.01563	0.968995	1.05635	0.964439
	2	2888.99	2921.57	2876.67	2724.62	2825.16		0.830557	0.841705	0.826345	0.774328	0.808721
	4	2489.69	2313.28	2258.16	2490.08	2472.2		0.69396	0.633612	0.614754	0.694092	0.687977
	8	2073.68	2060.09	2010.41	2103.6	2044.38		0.551645	0.546995	0.530001	0.561881	0.541623
	16	1799.61	1845.9	1709.48	1859.12	1743.11		0.457887	0.473722	0.427055	0.478247	0.438559
	32	1781.29	1762.59	1849.37	1761.53	1693.88		0.451619	0.445223	0.474909	0.44486	0.421719
	DMEM	455.375	453.142	471.649	453.61	471.863
HNF4G-SH1	cisplatin (uM)						percentages
	0	3907.1	3737.44	3955.52	3806.04	3851.82		1.01629	0.966513	1.03049	0.986639	1.00007
	2	2301.95	2018.01	2151.4	2124.5	2244.33		0.54536	0.462054	0.501189	0.493297	0.528454
	4	1706.42	1734.11	1661.46	1794.62	1725.33		0.370637	0.378761	0.357448	0.396515	0.376186
	8	1378.2	1289.47	1269.33	1316.41	1357.28		0.274341	0.24831	0.242401	0.256214	0.268205
	16	989.086	1129.23	999.153	1235.41	1053.45		0.160181	0.201298	0.163135	0.232448	0.179066
	32	1072.75	965.799	778.86	780.723	773.495		0.184728	0.153349	0.0985039	0.0990505	0.0969299
	DMEM	441.793	429.352	449.414	454.911	440.092
HNF4G-SH2	cisplatin (uM)
	0	3661.09	3596.36	3674.87	3760.93	3720.79		0.993276	0.973237	0.997542	1.02418	1.01176
	2	1833.37	2097.22	2016.23	1848.08	2104.81		0.427432	0.509117	0.484044	0.431987	0.511467
	4	1839.78	1617.59	1677.9	1623.16	1842.65		0.429416	0.360629	0.3793	0.362355	0.430306
	8	1264.8	1228.1	1299.08	1380.36	1432.62		0.25141	0.240049	0.262023	0.287184	0.303366
	16	1194.12	1299.38	1125.97	1224.5	1289.87		0.229526	0.262115	0.20843	0.238934	0.259171
	32	1062.99	988.516	1034.61	1050.37	832.48		0.188933	0.165875	0.180146	0.185025	0.117568
	DMEM	430.588	456.985	470.163	451.531	454.365
