# Supplementary material for: HNF4G increases cisplatin resistance in lung adenocarcinoma via the MAPK6/Akt pathway
Source: PeerJ. 2023 Mar 10;11:e14996. doi: 10.7717/peerj.14996 (PMC10010171; doi:10.7717/peerj.14996)
Supplement: Supplemental Information 6 [file peerj-11-14996-s006.xlsx]

## Sheet: A549-HNF4G-Akt Inhibitor
HNF4G-NC	cisplatin (uM)						percentages
	0	5413.84	5517.32	5232.62	5358.02	5489.3		1.00239	1.02364	0.965172	0.990923	1.01788
	2	4981.19	4808.47	4992.49	4930.18	4688.73		0.91354	0.878074	0.915862	0.903066	0.853483
	4	4088.68	4068.25	4152.14	4237.81	4261.96		0.730262	0.726068	0.743295	0.760886	0.765846
	8	3210.72	3494.3	3340.38	3289.3	3393.76		0.549973	0.608205	0.576598	0.566109	0.58756
	16	2846.1	2705.94	2642.72	2778.71	2543.6		0.475096	0.446315	0.433331	0.461258	0.412977
	32	2043.67	2112.49	2257.1	2313.05	2041.12		0.310316	0.324448	0.354145	0.365634	0.309792
	DMEM	544.42	502.535	544.512	523.583	547.571
HNF4G-NC+MK2206	cisplatin (uM)						percentages
	0	5116.21	5122.29	4956.05	4923.5	4800.81		1.02963	1.03099	0.993797	0.986516	0.95907
	2	3421.25	3335.92	3178.99	3538.49	3397.31		0.650444	0.631355	0.596248	0.676672	0.645088
	4	3038.91	3163.67	3228.27	3006.44	3065.74		0.564911	0.59282	0.607272	0.557646	0.570912
	8	2786.41	2555.48	2760.19	2591.09	2783.27		0.508423	0.456761	0.502558	0.464726	0.50772
	16	2363.16	2336.21	2323.89	2309.15	2277.24		0.413736	0.407707	0.40495	0.401654	0.394516
	32	1728.2	1825.98	1771.79	1742.13	1976.39		0.271689	0.293563	0.281439	0.274804	0.327211
	DMEM	520.067	526.464	498.262	516.645	507.303
HNF4G-OE	cisplatin (uM)						percentages
	0	6135.82	6132.64	5892.02	6181.33	5906.05		1.01565	1.01508	0.971406	1.02391	0.973952
	2	5660.41	5272.1	5449.5	5210.51	5679.09		0.929371	0.858896	0.891091	0.847717	0.932761
	4	4983.44	5021.59	4889.16	4835.12	5027.81		0.806507	0.813431	0.789396	0.779587	0.814559
	8	4291.7	4106.68	4346.23	4178.77	3935.77		0.680962	0.647382	0.690858	0.660466	0.616364
	16	4088.25	3753.88	3773.63	4046.04	3778.23		0.644037	0.583351	0.586937	0.636376	0.587772
	32	2912.15	2698.43	2708.67	3024.12	2898.29		0.430586	0.391798	0.393656	0.450907	0.428071
	DMEM	535.151	537.35	522.118	542.57	561.126
HNF4G-OE+MK2206	cisplatin (uM)
	0	5006.68	5142.07	4919.22	5218.59	5132.45		0.98326	1.01265	0.964275	1.02926	1.01056
	2	3782.45	3606.53	3611.41	3631.9	3770.52		0.717526	0.67934	0.6804	0.684847	0.714936
	4	2906.76	3145.95	3116.69	3219.82	2967.61		0.527445	0.579365	0.573014	0.595399	0.540654
	8	2720.51	2555.4	2820.73	2755.43	2389.44		0.487018	0.451179	0.508772	0.494599	0.415156
	16	2348.15	2152.73	2331.01	2472.91	2426.13		0.406194	0.363775	0.402472	0.433274	0.42312
	32	1561.08	1885.6	1851.99	1568.14	1571.14		0.235349	0.305792	0.298496	0.236882	0.237534
	DMEM	467.66	465.098	487.486	478.519	485.381

## Sheet: HCC827-HNF4G-Akt Inhibitor
HNF4G-NC	cisplatin (uM)						percentages
	0	4824.68	4741.09	4573.46	4484.22	4498.13		1.04713	1.02747	0.988037	0.967045	0.970318
	2	3362.98	3035.18	3091.38	3383.01	3114.1		0.703296	0.626188	0.639409	0.708009	0.644752
	4	2378.57	2343.71	2380.25	2467.64	2449.19		0.471735	0.463534	0.47213	0.492686	0.488345
	8	1929.82	2209.42	1916.26	2228.6	2143.86		0.366174	0.431944	0.362985	0.436457	0.416523
	16	1726.35	1703.75	2013.11	2002.21	2017.87		0.318312	0.312996	0.385767	0.383204	0.386886
	32	1412.11	1557.93	1454.6	1679.88	1539.07		0.244393	0.278695	0.25439	0.307382	0.274259
	DMEM	351.986	385.755	356.118	398.646	373.255
HNF4G-NC+MK2206	cisplatin (uM)						percentages
	0	3793.72	3824.15	4114.05	3926.94	3875.9		0.967619	0.976321	1.05923	1.00572	0.991119
	2	2432.86	2368.2	2157.09	2187.27	2275.38		0.578436	0.559946	0.499571	0.508202	0.533399
	4	1790.67	1555.33	1888.67	1788.45	1732.7		0.394782	0.327479	0.422808	0.394146	0.378203
	8	1123.26	1072.46	1181.96	1068	1336.42		0.203914	0.189387	0.220703	0.188112	0.264874
	16	1049.9	830.977	1002.41	776.323	1106.69		0.182935	0.120328	0.169355	0.104698	0.199176
	32	1016.27	806.701	882.903	793.712	942.326		0.173318	0.113385	0.135178	0.109671	0.152172
	DMEM	393.381	422.402	418.535	426.181	390.615
HNF4G-OE	cisplatin (uM)						percentages
	0	5051.2	5367.71	5401.15	5323.21	5321.1		0.950307	1.01539	1.02226	1.00624	1.0058
	2	3987.22	3998.82	3909.37	3778.97	3767.3		0.731534	0.733918	0.715527	0.688713	0.686314
	4	3728.11	3466.43	3530.72	3350.86	3413.74		0.678255	0.624449	0.637669	0.600686	0.613615
	8	2884.67	2966.19	2848.57	3061.94	3003.87		0.504828	0.521591	0.497405	0.541278	0.529339
	16	2481.84	2685.39	2575.86	2786.99	2581.69		0.421999	0.463854	0.441331	0.484743	0.44253
	32	2295.23	2368.63	2508.26	2477.35	2438.74		0.383629	0.398721	0.427432	0.421076	0.413136
	DMEM	441.044	436.69	409.209	429.635	430.943
HNF4G-OE+MK2206	cisplatin (uM)
	0	4247.13	4266.75	4460.18	4579.87	4430.92		0.962138	0.967096	1.01597	1.04621	1.00858
	2	2413.35	2461.7	2699.47	2651.02	2695.14		0.498781	0.510999	0.571076	0.558834	0.569982
	4	2085.61	1900.8	2160.64	2022.55	1846.84		0.415968	0.36927	0.434925	0.400034	0.355636
	8	1406.24	1360.29	1631.41	1480.15	1387.39		0.244303	0.232693	0.301201	0.262979	0.239541
	16	1238.93	1182.79	1071.52	994.772	1131.64		0.202029	0.187842	0.159728	0.140335	0.174919
	32	1014.98	1071.16	975.546	1083.01	1040.62		0.14544	0.159637	0.135477	0.162631	0.15192
	DMEM	456.977	428.475	447.075	437.043	427.357
