# Supplementary material for: HNF4G increases cisplatin resistance in lung adenocarcinoma via the MAPK6/Akt pathway
Source: PeerJ. 2023 Mar 10;11:e14996. doi: 10.7717/peerj.14996 (PMC10010171; doi:10.7717/peerj.14996)
Supplement: Supplemental Information 8 [file peerj-11-14996-s008.xlsx]

## Sheet: MAPK6 promoter
	Firefly-1	Firefly-2	Firefly-3	Firefly-4			Renilla-1	Renilla-2	Renilla-3	Renilla-4			Firefly/Renilla-1	Firefly/Renilla-2	Firefly/Renilla-3	Firefly/Renilla-4			Average	Fold-change
NC-1	3880.71	3994.23	3914.93	3765.9		NC 1-1	1130.34	1139.95	1094.36	1177.47		NC-1	3.43323	3.50385	3.57737	3.19829		NC-1	3.42819	1.09542
NC-2	3797.67	3528.16	3285.11	3454.38		NC 2-1	1327.54	1122.58	1097.44	1106.35		NC-2	2.86069	3.1429	2.99342	3.12233		NC-2	3.02984	0.968134
NC-3	3523.76	3245.22	3385.38	3422.85		NC 3-1	1284.65	1289.36	1105.02	1006.98		NC-3	2.74298	2.51691	3.06364	3.39912		NC-3	2.93066	0.936445
	Firefly-1	Firefly-2	Firefly-3	Firefly-4			Renilla-1	Renilla-2	Renilla-3	Renilla-4
OE-1	14951	15104.2	14797.8	14853.9		OE 1-1	1311.4	1260.13	1182.69	1217.53		OE-1	11.4008	11.9862	12.512	12.2		OE-1	12.0248	3.84231
OE-2	14282.3	14247.9	13979.8	14303.6		OE 2-1	1216.12	1053.7	1013.29	1043.75		OE-2	11.7441	13.5218	13.7965	13.7041		OE-2	13.1916	4.21517
OE-3	15596.3	15143.8	15069.3	14891.9		OE 3-1	1131.27	1066.8	947.721	1010.01		OE-3	13.7866	14.1955	15.9006	14.7443		OE-3	14.6567	4.68332

## Sheet: MAPK6 mutant promoter
	Firefly-1	Firefly-2	Firefly-3	Firefly-4			Renilla-1	Renilla-2	Renilla-3	Renilla-4			Firefly/Renilla-1	Firefly/Renilla-2	Firefly/Renilla-3	Firefly/Renilla-4			Average	Fold-change
NC-1	7849.96	8204.47	7964.07	7655.68		NC 1-1	2656.74	2883.94	2643.16	2642.96		NC-1	2.95474	2.84489	3.01309	2.89663		NC-1	2.92734	1.03611
NC-2	8296.95	7818.78	8106.77	7613.9		NC 2-1	3109.36	2816.13	3127.96	2800.75		NC-2	2.66838	2.77643	2.59171	2.71852		NC-2	2.68876	0.951671
NC-3	7238.21	6694.2	6893.98	6663.19		NC 3-1	2567.17	2435.93	2236.73	2388.7		NC-3	2.81953	2.74811	3.08217	2.78946		NC-3	2.85982	1.01222
	Firefly-1	Firefly-2	Firefly-3	Firefly-4			Renilla-1	Renilla-2	Renilla-3	Renilla-4
OE-1	8450.12	8000.68	8329.89	8714.09		OE 1-1	2894.01	2640.16	2448.41	2756.52		OE-1	2.91986	3.03038	3.40217	3.16126		OE-1	3.12842	1.10729
OE-2	8713.93	8087.86	8227.95	8399.83		OE 2-1	3086.43	2979.07	2809.95	2912.15		OE-2	2.82331	2.7149	2.92815	2.8844		OE-2	2.83769	1.00438
OE-3	9184.72	8936.68	9698.05	8983.53		OE 3-1	2635	2839.56	2260.88	2996.63		OE-3	3.48567	3.1472	4.28951	2.99788		OE-3	3.48006	1.23175
